# 1 Introducing `selfisher`: open source 2 software for statistical analyses of 3 fishing gear selectivity

4

5 Authors and affiliations:

6 Mollie E Brooks<sup>a</sup>, Valentina Melli<sup>a</sup>, Esther Savina<sup>a</sup>, Juan Santos<sup>b</sup>, Russell Millar<sup>c</sup>, Finbarr Gerard

7 O'Neill<sup>a</sup>, Tiago Veiga-Malta<sup>a</sup>, Ludvig Ahm Krag<sup>a</sup>, Jordan Paul Feekings<sup>a</sup>

8

9 <sup>a</sup> National Institute of Aquatic Resources, Technical University of Denmark, Lyngby, 2800

10 Denmark

11 <sup>b</sup> Thünen Institute of Baltic Sea Fisheries, Rostock, Germany

12 <sup>c</sup> Department of Statistics, The University of Auckland, Private Bag 92019, Auckland, New

13 Zealand

14

15 Keywords: catch comparison, covered codend, gillnet, mesh size, paired gear, trawl

16

17 Running Headline: R package `selfisher` for gear selectivity

18

## 19 Abstract

20 Fishing gear is constantly being improved to select certain sizes and species while  
21 excluding others. Experiments are conducted to quantify the selectivity and the resulting data  
22 needs to be analyzed using specialized statistical methods in many cases. Here, we present a  
23 new estimation tool for analyzing this type of data: an R package named `selfisher`. It can be  
24 used for both active and passive gears, and can handle different trial designs. It allows fitting  
25 models containing multiple fixed effects (e.g. length, total catch weight, mesh size, water  
26 turbidity) and random effects (e.g. haul). A bootstrapping procedure is provided to account for  
27 between and within haul variability and overdispersion. We demonstrate its use via four case  
28 studies including (1) covered codend analyses of four gears, (2) a paired gear study with  
29 numerous potential covariates, (3) a catch comparison study of unpaired hauls of gillnets and  
30 (4) a catch comparison study of paired hauls using polynomials and splines. This free and open  
31 source software will make it easier to model fishing gear selectivity, teach the statistical  
32 methods, and make analyses more repeatable.

33

## 34 Table of contents

35 Introduction

36 Implementation of `selfisher`

37 Installing `selfisher` and where to ask questions

38 Background of selectivity

39       Retention models

40       Selectivity statistics  $I_{50}$  and SR

41       Subsampled catches

42 Three experimental design categories

43       Covered codend

44       Paired gear (where one gear is nonselective)

45       Catch comparison (where both gears are selective)

46 Handling extra variability

47       Overdispersion

48       Quantify uncertainty by bootstrapping

49       Bootstrapping and mixed modeling

50 Case studies

51       Covered codend analyses of four codends catching haddock

52       Paired gear analyses in a brown shrimp fishery where mesh size affects selectivity

53       Catch comparison analyses of unpaired hauls of gillnets avoiding an unwanted crab

54       Catch comparison analyses of paired hauls of Nephrops trawls

55 Discussion

56

## 57 Introduction

58 Fisheries aim to select for certain species and sizes of individuals while allowing others  
59 to avoid capture. Experiments are conducted to measure the selectivity of fishing gear and  
60 statistical models are used to characterize the selectivity patterns. The selectivity of fishing gear  
61 is commonly described by a retention curve, i.e. the probability of being retained in the net,  
62 which is usually a function of individual length or size and may vary between hauls (Wileman et  
63 al., 1996). Between-haul variation may be random, or it may depend on observed covariates  
64 such as total catch weight (Fryer, 1991; Suuronen & Millar, 1992; Erickson et al., 1996; O'Neill &  
65 Kynoch, 1996), environmental variables (He, 1993; Walsh & Hickey, 1993; Ryer & Barnett,  
66 2006, Somerton et al., 2013), or the condition of individuals (Özbilgin et al., 2007; Ferro et al.,  
67 2008).

68 In some cases, catch data collected in selectivity studies could be analyzed with logistic  
69 regression methods, i.e. binomial generalized linear models, for which there are plenty of  
70 software options available. Binomial models are appropriate because, in many gear selectivity  
71 experiments, individuals end up in one of two compartments (e.g. codend vs cover; gear 1 vs  
72 gear 2; or test gear vs control gear; Wileman et al., 1996), i.e. there are two possible outcomes  
73 as in coin flips. However, a substantial amount of the analyses in this field are specialized and  
74 require specialized software. For example, obtaining confidence intervals on predictions  
75 typically requires accounting for extra-binomial variability (overdispersion) between and within  
76 hauls (Millar, 1993; Millar et al., 2004). Paired gear studies (where the test gear is tested against  
77 a control one with retention probability equal to one for the given species and lengths of interest)  
78 is another example that does not conform to a typical logistic regression model because the  
79 probability model is more complex as we will show below. This paper presents newly developed  
80 open source software that is specifically designed for modelling fishing gear selectivity,  
81 something that was previously limited. The package, `selfisher`, is implemented in the R

82 statistical computing environment which is commonly used for many modern fisheries analyses  
83 (R core team 2020). The package is written with an interface that will be familiar to many users  
84 of regression methods in R. By making the software free and openly available, we aim to  
85 improve repeatability of analyses and enable teaching these analytical methods in classrooms  
86 for the next generation of fisheries scientists.

87         In this paper, first, we briefly describe the implementation of the `selfisher` R package.  
88 We describe how to install the latest version of the package and where to report bugs and  
89 where to reach out to other users with questions. Then, we provide a general description of how  
90 models are estimated by the package, including dealing with subsampled catches, a common  
91 occurrence in gear selectivity studies (e.g. Larsen et al., 2018; Melli et al., 2019; Veiga-Malta et  
92 al., 2020). We also address the common issue of overdispersion related to between-haul  
93 variability (Millar et al., 2004). We describe three general categories of statistical models,  
94 divided based on the mathematical probabilities underlying the estimation, while omitting details  
95 about experimental designs and code to run the models. Then, we describe the bootstrapping  
96 procedure used to account for variation within and between hauls in selectivity (Millar, 1993),  
97 potentially resampling from distinct pools of hauls based on gear type or tactic as in unpaired  
98 hauls (Herrmann et al., 2017; Savina et al., 2017). Then, we briefly describe four case studies  
99 used to illustrate the package's capabilities, while providing more thorough descriptions with R  
100 code in online appendices. The case studies are (1) a covered codend study of haddock  
101 (*Melanogrammus aeglefinus*) with four different codends (O'Neill et al., 2016), (2) a paired gear  
102 study in a brown shrimp (*Crangon crangon*) trawl fishery where one trawl is nonselective  
103 (Santos et al., 2018), (3) a catch comparison study of unpaired hauls of gillnets avoiding an  
104 unwanted crab (*Cancer pagurus*) (Savina et al., 2017), and (4) a catch comparison study of  
105 paired hauls in a Norway lobster (*Nephrops norvegicus*) trawl fishery (Melli et al., 2018). Finally,  
106 we discuss current limitations of the `selfisher` package and potential future advancements.

## 107 Implementation of `selfisher`

108       The `selfisher` package was designed to be flexible and robust for fitting and  
109 assessing a variety of gear selectivity models that can be represented with a binomial  
110 distribution. The code for `selfisher` was developed by modifying the R package `glmmTMB`  
111 (Brooks et al., 2017) because `glmmTMB` already had the capabilities needed for fitting and  
112 analyzing binomial mixed effect models. Previously, `glmmTMB` was developed by adapting the  
113 popular user interface from `lme4` (Bates et al., 2015) and increasing the model flexibility and  
114 fitting robustness by doing estimation with `TMB` (i.e. Template Model Builder). Prior to the  
115 development of `glmmTMB`, `TMB` was developed based on the algorithm of AD Model Builder  
116 (`ADMB`), which performs maximum likelihood estimation (MLE) in a fast and robust way (Fournier  
117 et al., 2012; Miller, 2013; Kristensen et al., 2016). The algorithm is fast and robust because it  
118 has information on the gradients of the likelihood surface via automatic differentiation.  
119 Additionally, `TMB` improves robustness by providing binomial and beta-binomial likelihood  
120 functions that are numerically stable even when probabilities are near zero or one. Thus,  
121 through inheritance, `selfisher` has a flexible user interface with `lme4`-style syntax and robust  
122 `TMB` code underlying the model estimation which is done using the same MLE algorithm as  
123 `ADMB`.

## 124 Installing `selfisher` and where to ask questions

125       The package is continuously being improved and the most recent version can be found  
126 online in a GitHub repository. The current version of the package is 1.0.0. News about changes  
127 in each version can be found by typing `news(package="selfisher")` in an R console after installing  
128 the package. The package is mature enough that we do not expect to have changes that will

129 affect existing models; most changes will be additions of new features (see Discussion below).  
130 The address of the GitHub repository is <https://github.com/mebrooks/selfisher>. There, you can  
131 find installation instructions and a forum for reporting bugs (i.e. issue tracker). Users are  
132 discouraged from posting questions on the issue tracker, which is reserved for bugs. For  
133 questions about selfisher, an email group is provided where users are encouraged to openly ask  
134 and answer each other's questions (<https://groups.google.com/d/forum/selfisher-users>).

## 135 Background of selectivity

136 All models in `selfisher` involve comparing the catches from two compartments (e.g.  
137 test vs control gear, gear 1 vs gear 2, or codend vs cover), which gives rise to data that can be  
138 analysed as a binomial response, subject to the use of appropriate methods to allow for  
139 overdispersion as described below. Due to technicalities of the underlying code, in `selfisher`  
140 syntax, the binomial response must be specified as a proportion (i.e. proportion of individuals of  
141 a given length in one compartment of one haul with respect to the total) and a total (i.e. total  
142 number of individuals of a given length in either compartment in one haul), as we will  
143 demonstrate in case studies.

144 There are three main categories of experimental designs in which each individual has  
145 two possible outcomes, i.e. studies that produce binomial data. The categories are (1) a  
146 selective net inside an outer nonselective small-mesh cover net (covered codend), (2) a  
147 selective net compared to a nonselective net (paired gear), and (3) a comparison between two  
148 selective gears (catch comparison). These can all be modeled using `selfisher` as we  
149 describe in sections below, but first we describe some generalities.

## 150 Retention models

151 All three categories of analyses involve estimating a retention model; covered codend  
152 and paired gears experiments allow one to estimate the absolute retention, i.e. retention out of  
153 the population encountered by the gear, while in a catch comparison experiment the estimated  
154 retention is relative to that of a baseline gear. Regardless, the mathematical formulation is  
155 general. We use  $r(l)$  to refer to the retention model throughout this text, but as we describe in  
156 case studies below, it may depend on covariates other than length,  $l$ . See Table 1 for a  
157 description of all notations. As in binomial generalized linear models (GLMs), retention models  
158 use a link function to keep the retention probability in the range from zero to one. The most  
159 common link is the "logit" (i.e. logistic), but other options include, "probit" (i.e. normal  
160 probability ogiv), "cloglog" (i.e. negative extreme value), "loglog" (i.e. extreme  
161 value/Gompertz), or "Richards". The software default is the logit link. To fit retention model  
162 shapes that are more diverse than the built-in link functions, it is possible to use a logit link with  
163 more complex models such as polynomials (Holst & Revill, 2009) or smooth functions (Skalski &  
164 Perez-Comas, 1993; Munro & Somerton, 2001; Fryer et al., 2003; Somerton et al., 2013) as  
165 demonstrated in case studies 3 and 4 below.

## 166 Selectivity statistics $I_{50}$ and SR

167 Two estimated summary statistics of interest are the length with 50% probability of  
168 retention ( $I_{50}$ ) and the selection range (SR, i.e. the width of the range of length classes with 25%  
169 to 75% retention probabilities). Note that they only apply to models where retention probability  
170 monotonically increases with length, such as in covered codend and paired gear studies. In  
171 simple models with only length or size as a predictor of retention, then  $I_{50}$  and SR can be  
172 extracted from a model using the function `L50SR()`. In more complex models, such as the



173 covered codend and paired gear case studies below, which involve additional covariates  
174 besides length, there are multiple ways to extract  $I_{50}$  and SR estimates. The covered codend  
175 case study demonstrates how to extract them algorithmically by finding the lengths that  
176 correspond to retention probabilities 0.25, 0.5, and 0.75 for each given value of covariates in the  
177 model. The paired gear example solves for  $I_{50}$  and SR mathematically using a model's estimated  
178 coefficients. For either method, confidence intervals can be obtained by bootstrapping. In the  
179 future, a function will be added to `selfisher` which will be similar to the method demonstrated  
180 in the covered codend study.

## 181 Subsampled catches

182 Often, in cases of abundant catches, it may not be feasible to measure the length of  
183 every individual that is caught and in those cases, only a fraction of the catch may be measured.  
184 This leads to additional statistical complexity in the analyses, but we have made `selfisher`  
185 capable of handling subsampling in any model. Here we denote the approximate fraction of  
186 individuals in compartment  $i$ , of haul  $h$ , and length class  $l$  that were sampled as  $s_{i,h,l}$ . Although  
187 subsampling doesn't always depend on  $l$ , we have written the package to be flexible enough to  
188 handle cases where each observed count (e.g.  $n_{i,h,l}$ ) has a different subsampling fraction. It is  
189 sufficient to include the ratio of subsampling fractions (i.e. the subsampling ratio) in a model,  
190 rather than each compartment's fraction individually,  $q_{h,l} = s_{i,h,l}/s_{j,h,l}$ , assuming here that  $i$  is  
191 the compartment being considered as "success" in the binomial context and  $j$  is the alternative  
192 compartment. If raising factors were recorded in the data instead of subsampling fractions, then  
193 care should be taken when calculating the subsampling ratio to account for the fact that a  
194 raising factor is the inverse ( $1/s_{i,h,l}$ ) of a subsampling fraction. Subsampling fractions are  
195 between zero and one, while raising factors are greater than or equal to one.

196 The most general way to account for subsampling in a selfisher model is to specify the  
197 subsampling ratio  $q_{h,l}$  using the argument `qratio` in a call to the `selfisher` function. In  
198 covered codend models with logit links (Millar, 1994) or catch comparison models with logit links  
199 (Holst & Revill, 2009) an `offset` could be used instead, but using `qratio` will be more broadly  
200 applicable because it can be used with any type of link and in paired gear models in addition to  
201 the other types.

## 202 Three categories of experimental designs

### 203 Covered codend

204 One way of characterizing the selectivity of towed gear is to capture the individuals that  
205 escape the net using a small-mesh cover, commonly known as the covered codend method.  
206 Then, the statistical model has strong information on retention because the total number of  
207 individuals encountered in each length class is directly observed. In this category, we compare  
208 the number of individuals sampled in the cover in haul  $h$  with length  $l$  ( $n_{1,h,l}$ ) and codend ( $n_{2,h,l}$ )  
209 by modeling the proportion  $\frac{n_{1,h,l}}{n_{1,h,l} + n_{2,h,l}}$  as the probability of being retained and  
210 sampled in the codend divided by the probability of being retained and sampled in the codend or  
211 escaping to the cover and being sampled (Millar, 1994):

$$212 \phi_{covered,h,l} = \frac{r(l)s_{1,h,l}}{r(l)s_{1,h,l} + (1 - r(l))s_{2,h,l}} \text{ or more simply in terms of the subsampling ratio:}$$

$$213 \phi_{covered,h,l} = \frac{r(l)q_{h,l}}{r(l)q_{h,l} + (1 - r(l))}$$

214 See Table 1 for definitions of all symbols.

## 215 Paired gear (where one gear is nonselective)

216 Another way to characterize the selectivity of a fishing gear is to acquire knowledge on  
217 the population available to be caught in each haul. Paired gear studies accomplish this by  
218 deploying a control gear or codend (besides the one whose selectivity is being measured) that  
219 has full retention for the species and lengths of interest, i.e. all individuals of the given species  
220 entering that gear are retained. We assume that there is a probability,  $p_h$ , of entering the test  
221 gear in haul  $h$ , given that the individual goes into either the test ( $t$ ) or control ( $c$ ) gear. The  
222 proportion of individuals observed in the test gear in haul  $h$  with length class  $l$  compared to the

223 
$$\frac{n_{t,h,l}}{n_{t,h,l} + n_{c,h,l}}$$
  
total number of individuals observed is modeled as the probability of entering  
224 the test net, being retained, and being counted, divided by the probability of entering either net,  
225 being retained and being counted:

$$226 \phi_{paired,h,l} = \frac{p_h s_{t,h,l} r(l)}{p_h s_{t,h,l} r(l) + 1 - p_h s_{c,h,l}}$$

227 It's convenient to write the model more simply in terms of the subsampling ratio:

$$228 \phi_{paired,h,l} = \frac{p_h q_{h,l} r(l)}{p_h q_{h,l} r(l) + 1 - p_h}$$

229 In paired gear studies, the ideal relative fishing power is 50% (i.e.  $p=0.5$ ). If this is known  
230 *a priori* then it is possible to fix  $p$  at 0.5 by specifying `pformula=~0` in the `selfisher` model.  
231 If another value of  $p$  is known *a priori* due to differences in effort, such as swept areas, then that  
232 can be specified using the `qratio` argument. For example, if the study has (haul-specific)  
233 subsampling fractions  $st$  and  $sc$  as well as (haul-specific) swept areas of  $at$  and  $ac$  for the test  
234 and control gear respectively, then one could use argument `qratio = at / ac * st /`  
235 `sc` together with `pformula=~0` (e.g. Somerton et al., 2013).

## 236 Catch comparison (where both gears are selective)

237 Catch comparison studies compare the catches in two gears, both of which are  
238 selective. Consequently, there is no direct information about the length distribution of the  
239 population being fished and it is only possible to model the relative retention probability given  
240 the population encountered during testing (Revill & Holst, 2004). In general, the relative  
241 retention probability model can be of arbitrary shape and, for example, may not be monotone.

242 The response variable is the proportion of fish retained by one gear versus the other

$$243 \frac{n_{1,h,l}}{n_{1,h,l} + n_{2,h,l}} .$$

244 In a catch comparison study, the expected proportion of the total catch retained and sampled in  
245 gear 1 versus gear 2 is the probability of entering gear 1, being retained in gear 1, and being  
246 sampled over the probability of entering, being retained, and being sampled in either gear. It is  
247 always modeled with a logit link:

$$248 \phi_{compare,h,l} = \frac{p_h s_{1,h,l} r_1(l)}{p_h s_{1,h,l} r_1(l) + (1 - p_h) s_{2,h,l} r_2(l)}$$

249 where  $r_1(l)$  and  $r_2(l)$  are the absolute retention probabilities of the two gears, but it isn't possible  
250 to estimate them separately. Holst & Revill (2009) showed that the expected proportion can be  
251 approximated with a polynomial with a logit link and an offset to account for any subsampling.  
252 They showed that the relative fishing pressure  $p_h$  can be absorbed by the intercept and that it  
253 may vary randomly between hauls. The `selfisher` package allows fitting a random intercept  
254 of haul as in a mixed effects model. In general, the relative retention model in a catch  
255 comparison analysis can be formulated as either a polynomial (Holst & Revill, 2009) or a spline  
256 (Miller, 2013); see the catch comparison case studies in Appendices 3 and 4 for a  
257 demonstration of how this can be done with `selfisher`.

## 258 Handling extra variability

### 259 Overdispersion

260 Overdispersion is the presence of variability in the proportions that is in excess of the  
261 variability specified under the binomial model. Overdispersion can arise due to between-haul  
262 variability whereby the retention model varies from haul to haul. To a lesser extent it can also  
263 arise due to within-haul variability due to schooling behavior that violates the assumption that all  
264 fish behave independently. The accepted approaches for including this variability are the use of  
265 bootstrapping (Millar, 1993) and the use of mixed effects models (Millar et al., 2004). Both of  
266 these methods are available in `selfisher`. See the covered codend and paired gear case  
267 studies (Appendices 1 and 2) for examples of using mixed effects in `selfisher`. In this text,  
268 we do not get into the details of random effects because it is a large topic; however, note that in  
269 `selfisher`, they are implemented in the same way as `glmmTMB` (Brooks et al., 2017) using the  
270 Laplace approximation, which is a standard method commonly used in modern mixed  
271 modelling. All of the case studies demonstrate how to bootstrap as described below.

### 272 Quantify uncertainty by bootstrapping

273 For any statistical model, it is important to compare predictions from the model - and the  
274 uncertainty around those predictions - with observed data to ensure that the model reasonably  
275 represents the data. A bootstrapping procedure was developed by Millar (1993) to account for  
276 variation between and within hauls and calculate appropriately wide confidence intervals. The  
277 bootstrapping method can account for overdispersion in data due to variability among hauls (as  
278 described above in the *Overdispersion* section); because of this, it is not necessary to include a  
279 random effect of haul in models to be bootstrapped. The bootstrapping method is also

280 sometimes referred to as a “double bootstrap” in fishing gear selectivity literature, but this term  
281 has another meaning in statistics (e.g. Kuk, 1989). This method first resamples the same  
282 number of hauls from the observed set, with replacement. Then for each resampled haul, the  
283 method resamples observed fish within the haul. Then it refits the model to the resampled data  
284 set and the refit model is used to produce values such as predictions or parameter estimates. It  
285 is typically repeated one thousand times or more. This bootstrapping method is implemented in  
286 `selfisher` in a way that maintains all variables associated with each observed data point, not  
287 just length class, e.g. sampling fractions or total catch. This is facilitated by specifying the `haul`  
288 argument in the `selfisher` model fitting function; followed by a call to the `bootSel` function.

289         It is also possible to do resampling from pools of hauls, so that every bootstrapped  
290 dataset has the same number of hauls in each pool as in the original data (Herrmann et al.,  
291 2017). That is, if the original dataset has  $H_A$  hauls of type A and  $H_B$  hauls of type B, then it is  
292 possible to bootstrap in a way such that simulated data sets have  $H_A$  hauls of type A and  $H_B$   
293 hauls of type B. This is done using the `pool` argument to the `selfisher` function. The inner  
294 part of the bootstrapping method (resampling fish within hauls) is the same as in the regular  
295 bootstrapping method. This is useful when hauls of the two gears or tactics being compared are  
296 unpaired. See the gillnet case study in Appendix 3 for an example of specifying pools of hauls.

## 297 Bootstrapping and mixed modeling

298         Mixed modelling is a formal method that takes into account possible sources of  
299 variability in the data such as variation between hauls, enabling sound hypothesis testing and  
300 model selection. However, fitting mixed models can be computationally intensive. Moreover, the  
301 researcher is typically interested in obtaining overall selectivity predictions, rather than at the  
302 haul level, because these are relevant to the selectivity applied to the fishery. In that case it is  
303 necessary to refit the best candidate model, leaving out any random effects. Bootstrapping can

304 then be used to obtain confidence intervals for estimated quantities such as predicted retention  
305 curves or  $I_{50}$  and SR. See case studies 1 and 2 for examples.

## 306 Case studies

### 307 1. Covered codend analyses of four codends catching haddock

308 This case study uses the haddock data from an experiment that employed the covered  
309 codend method to investigate the selective performance of four codends (O'Neill et al., 2016).  
310 The codends were made from netting materials with different twine bending stiffnesses and  
311 mesh sizes.

312 We begin the case study by looking at just one gear type to demonstrate different link  
313 functions that can be used and to show how to account for subsampling, which in this example  
314 varies with length. The default link is the logistic, but we also consider the probit and Richards  
315 curves and a spline. Having chosen a model, we bootstrap to estimate 95% confidence intervals  
316 for the proportion retained by the codend.

317 We then analyse all four gear types together and investigate the influence of length,  
318 mesh size, bending stiffness and catch size. We assume the principle of geometric similarity (as  
319 used by Tokai et al. (1996) to investigate grid selection) and explore a number of models and  
320 choose the best fit using Bayesian information criterion (BIC). When choosing the best model,  
321 we include a random effect of haul to account for between-haul variation. As in the original  
322 publication, we show that selection is dependent on all three parameters. Before bootstrapping,  
323 we drop the random effect of haul from the best model because the bootstrapping method  
324 accounts for between-haul variability and the random effect would slow it down considerably.  
325 We bootstrap to estimate confidence intervals for the proportion retained by each gear and  
326 numerically solve for  $I_{50}$  and SR dependent on covariates. See Appendix 1 for details and code.

## 327 2. Paired gear analyses of codend selectivity dependent on 328 mesh size

329 This case study draws on a subset of data from the German research project CRANNET  
330 (Santos et al., 2018). The experimental method consisted of fishing with two identical beam  
331 trawls, simultaneously and in parallel on the same shrimp population. One of the trawls mounted  
332 a small-mesh (11 mm) control codend with very limited selectivity, assumed to be nonselective  
333 on the range of shrimp lengths available for the trawl. The second trawl mounted a test codend.  
334 The subset of data analyzed here consists of catch data from 87 hauls, during which 13  
335 diamond-mesh codends varying in mesh size ranging from 19.1 mm to 36.3 mm were tested.  
336 The goal was to model  $I_{50}$  and SR as a function of mesh size, and to quantify any effect of two  
337 additional haul covariates, sea state and catch weight.

338 The statistical modeling of selectivity begins with a mixed model to formally assess the  
339 effect of mesh size, sea state and catch weight, while controlling for random variation among  
340 hauls. *A priori*, the assumption of geometric similarity (that is,  $I_{50}$  and SR being proportional to  
341 mesh size) was assumed to be the default model, and it is shown that this corresponds to using  
342 a  $I(\text{length}/\text{meshsize})$  term in the `selfisher` formula interface for the retention model  
343 (Baranov, 1948). The default model was compared to several others and found to be preferred  
344 (using BIC), and neither sea state nor catch weight had a significant effect.

345 Having chosen geometric similarity (with respect to mesh size) as the preferred model,  
346 this model was refitted without random effects so as to estimate size selectivity at the population  
347 level. Bootstrapping was used to obtain appropriate confidence intervals on  $I_{50}$  and SR for any  
348 given mesh size.

349 In addition, this case study demonstrates the use of `psplit=TRUE` (unequal fishing  
350 power of the paired codends), the use of sampling ratios, use of the `inits()` function to



351 specify good starting values (because without it some models converged to local minima that  
352 didn't make any sense), and shows how  $I_{50}$  and SR can be obtained directly from the model  
353 fitted by `selfisher`. See Appendix 2 for details and code.

### 354 3. Catch comparison analyses of unpaired hauls of gillnets 355 avoiding an unwanted crab

356         This example deals with data from an experiment originally published by Savina et al.  
357 (2017). Two soak tactics (12h at day and 12h at night) were compared in the Danish gillnet  
358 plaice fishery to estimate the role that the choice of a soak tactic plays in the catch efficiency of  
359 both target and unwanted species. This is a subset of the original dataset (one species, two  
360 soak tactics) where we are looking at the unwanted invertebrate edible crab (*Cancer pagurus*).

361         We use the method developed by Herrmann et al. (2017) which was developed for  
362 assessing the effect of changing the gear design on the relative length-dependent catch  
363 efficiency. This example is representative of experimental fishing where the catch data obtained  
364 for two gears or tactics were not collected in pairs, and can allow for a different number of  
365 deployments.

366         This case study is a typical model for catch comparison of multiple haul data without  
367 subsampling using a spline. To get confidence intervals on predictions, we bootstrapped from  
368 two pools according to tactic (Night vs Day) using the argument `pool=tactic` to the `bootSel`  
369 function. See Appendix 3 for details and code.

## 370 4. Catch comparison analyses of paired hauls of *Nephrops*

### 371 twin-rigged trawls

372           The example is based on the data from Melli et al. (2018). An anterior gear modification,  
373 namely the counter-herding device FLEXSELECT, was tested in a twin-rig configuration, where  
374 two identical trawls were towed in parallel. One trawl was equipped with FLEXSELECT, referred  
375 to as the test trawl, while the other worked as baseline. The aim of the study was to determine if  
376 FLEXSELECT could reduce the fish bycatch in a *Nephrops*-directed fishery. The data used in  
377 the example are from haddock, which was found to be strongly affected by the counter-herding  
378 device.

379           Following the steps of the published paper, we conducted a catch comparison analysis,  
380 modeling the relative retention as a 4th-order polynomial. In addition, we used a spline with 4  
381 degrees of freedom using the `splines` package and performed model selection to determine if  
382 it fitted the data better. Considering that part of the hauls were conducted in day-time and part in  
383 night-time, “time” was included in the model as an explanatory variable to determine if the  
384 length-based efficiency of FLEXSELECT presented diel differences. We predicted both catch  
385 comparison rates and catch ratio with bootstrapped confidence intervals using the `predict`  
386 and `bootSel` functions from `selfisher`. See Appendix 4 for details and code.

## 387 Discussion

388           We have introduced an open source R package for estimating fishing gear selectivity of  
389 both towed and passive gear, making it easier for anyone to analyze fishing gear selectivity data  
390 without writing extensive amounts of code. We have demonstrated its broad applicability in four  
391 case studies spanning a range of experimental designs. The case studies have shown that

392 results from `selfisher` are comparable to previously published results and that `selfisher`  
393 is more flexible than some methods (e.g. a single model to quantify the effect of changing mesh  
394 size on  $I_{50}$  and SR). Some of the features of `selfisher` that were demonstrated in the case  
395 studies are summarized in Table 2. The case studies aim to demonstrate best practices based  
396 on current knowledge. However, this is an active area of research and with a new powerful  
397 model fitting tool, best practices may change. Even with (or especially with) a powerful tool,  
398 analyses require careful thought and checking of results. For example, in complicated models  
399 such as paired gear models which contain two submodels (retention and relative fishing power),  
400 it may be necessary to be cautious about identifiability of parameters and local optima  
401 encountered during maximum likelihood estimation, but better starting values help avoid those  
402 issues as demonstrated in Appendix 2 (Bolker et al., 2013).

403       We have several advancements for the package either planned for the future or already  
404 underway. We plan to add functions to calculate discard ratio indices and indicator functions  
405 (e.g. Wienbeck et al., 2014; Santos et al., 2016; Veiga-Malta et al., 2019). We may add a  
406 function to facilitate model averaging, although it is currently possible to piece this functionality  
407 together with the existing features. We have not tried to fit structured non-monotonic curves  
408 (e.g. bell-shaped curves of gillnet absolute selectivity based on geometric similarity, Baranov  
409 1948) with `selfisher`, but we will explore this possibility in the future. We will investigate how  
410 to choose starting values of parameters in models that have Richards link, to increase  
411 robustness. We plan to implement a general method to extract  $I_{50}$  and SR from complex models  
412 as demonstrated in case studies 1 and 2. To handle overdispersion more elegantly, we plan to  
413 add the option of having a beta-binomial distribution for the response (Miller, 2013). We are  
414 already in the process of developing a Shiny app, which will facilitate simple standard analyses  
415 without the need for writing code; this will help bridge the gap for scientists or managers with  
416 extensive experience in gear development but little experience with R. As an open source

417 package, code developers are encouraged to contribute improvements through GitHub such as  
418 those listed here.

419         Having access to a free and open source software should benefit this field of research in  
420 several ways. It allows researchers to share code and thereby foster a community for discussion  
421 and repeatability. The free nature of the software will enable researchers and managers with  
422 limited budgets - such as those in developing countries - to perform analyses themselves. It  
423 gives statistical methods of retention modelling a way into classrooms containing the next  
424 generation of fisheries scientists who are already learning modern regression methods as part  
425 of a general scientific curriculum.

## 426 Acknowledgements

427 We thank William T. Stockhausen for the trick of fixing  $P_h$  to any number in a paired gear  
428 analysis. We thank the helpful crews of both research and commercial vessels, as well as the  
429 fisheries technicians of the research institutes providing essential support during the fishing  
430 trips. We are grateful for funding from the European Maritime and Fisheries Fund (EMFF) and  
431 the Ministry of Environment and Food of Denmark (Miljø- og Fødevarerministeriet) as part of the  
432 projects FastTrack – Sustainable, cost effective and responsive gear solutions under the landing  
433 obligation (33112-P-15-013), FastTrack II – Sustainable, cost effective and responsive gear  
434 solutions under the landing obligation (33112-P-18-051), and Flexselect - Innovative and  
435 Flexible solutions for the Nephrops Fisheries (33113-I-16-068).

436

## 437 ORCID

438 Mollie E Brooks <https://orcid.org/0000-0001-6963-8326>

- 439 Valentina Melli <https://orcid.org/0000-0002-4778-9331>
- 440 Esther Savina <http://orcid.org/0000-0003-4564-5112>
- 441 Juan Santos <https://orcid.org/0000-0003-4277-7734>
- 442 Russell Millar <https://orcid.org/0000-0002-1121-8721>
- 443 Barry O’Neill <http://orcid.org/0000-0002-2797-4548>
- 444 Tiago Alexandre Matias da Veiga Malta <http://orcid.org/0000-0001-8880-3243>
- 445 Ludvig Ahm Krag <https://orcid.org/0000-0002-1531-1499>
- 446 Jordan Paul Feekings <https://orcid.org/0000-0001-9103-7332>

## 447 Data Availability Statement

448 Data used in the case studies is available as part of the `selfisher` package on GitHub. See  
449 the *Installation* section above as well as the appendices.

## 450 References

- 451 Baranov, F. I. (1948). Theory and assessment of fishing gear. In Theory of fishing with gillnets.  
452 Chap. 7. Pishchepromizdat, Moscow. (Translation from Russian by Ontario Dept of  
453 Lands, Maple, Ont., 45 pp.)
- 454 Bates, D., Mächler, M., Bolker, B., & Walker, S. (2015). Fitting linear mixed-effects models using  
455 lme4. *Journal of Statistical Software*, 67(1), 1–48. <http://dx.doi.org/10.18637/jss.v067.i01>
- 456 Bolker, B. M., Gardner, B., Maunder, M., Berg, C.W., Brooks, M., Comita, L., Crone, E.,  
457 Cubaynes, S., Davies, T., de Valpine, P., Ford, J., Gimenez, O., Kéry, M., Kim, E.J.,  
458 Lennert–Cody, C., Magnusson, A., Martell, S., Nash, J., Nielsen, A., Regetz, J., Skaug,  
459 H. and Zipkin, E. (2013), Strategies for fitting nonlinear ecological models in R, AD

- 460 Model Builder, and BUGS. *Methods Ecol Evol*, 4: 501-512.
- 461 <https://doi.org/10.1111/2041-210X.12044>
- 462 Brooks, M. E., Kristensen, K., van Benthem, K. J., Magnusson, A., Berg, C. W., Nielsen, A.,  
463 Skaug, H.J., Machler, M., & Bolker, B. M. (2017). glmmTMB balances speed and  
464 flexibility among packages for zero-inflated generalized linear mixed modeling. *The R*  
465 *journal*, 9(2), 378-400. <https://doi.org/10.3929/ethz-b-000240890>
- 466 Erickson, D. L., Perez-Comas, J. A., Pikitch, E. K., & Wallace, J. R. (1996). Effects of catch size  
467 and codend type on the escapement of walleye pollock (*Theragra chalcogramma*) from  
468 pelagic trawls. *Fisheries Research*, 28(2), 179-196.  
469 [https://doi.org/10.1016/0165-7836\(96\)00497-3](https://doi.org/10.1016/0165-7836(96)00497-3)
- 470 Ferro, R. S. T., Özbilgin, H., & Breen, M. (2008). The potential for optimizing yield from a  
471 haddock trawl fishery using seasonal changes in selectivity, population structure and fish  
472 condition. *Fisheries research*, 94(2), 151-159.  
473 <https://doi.org/10.1016/j.fishres.2008.08.018>
- 474 Fournier, D. A., Skaug, H. J., Ancheta, J., Ianelli, J., Magnusson, A., Maunder, M. N., Nielsen,  
475 A., & Sibert, J. (2012). AD Model Builder: using automatic differentiation for statistical  
476 inference of highly parameterized complex nonlinear models. *Optimization Methods and*  
477 *Software*, 27(2), 233-249. <https://doi.org/10.1080/10556788.2011.597854>
- 478 Fryer, R. J. (1991). A model of between-haul variation in selectivity. *ICES Journal of Marine*  
479 *Science*, 48(3), 281-290. <https://doi.org/10.1093/icesjms/48.3.281>
- 480 Fryer, R. J., Zuur, A. F., & Graham, N. (2003). Using mixed models to combine smooth  
481 size-selection and catch-comparison curves over hauls. *Canadian Journal of Fisheries*  
482 *and Aquatic Sciences*, 60(4), 448-459. <https://doi.org/10.1139/f03-029>
- 483 He, P. (1993). Swimming speeds of marine fish in relation to fishing gears. *ICES Mar. Sci.*  
484 *Symp*, 196, 183-189.

- 485 Herrmann, B., Sistiaga, M., Rindahl, L., & Tatone, I. (2017). Estimation of the effect of gear  
486 design changes on catch efficiency: methodology and a case study for a Spanish  
487 longline fishery targeting hake (*Merluccius merluccius*). *Fisheries Research*, 185,  
488 153-160. <https://doi.org/10.1016/j.fishres.2016.09.013>
- 489 Holst, R., & Revill, A. (2009). A simple statistical method for catch comparison studies. *Fisheries*  
490 *Research*, 95(2-3), 254-259. <https://doi.org/10.1016/j.fishres.2008.09.027>
- 491 Kristensen, K., Nielsen, A., Berg, C.W., Skaug, H., Bell, B.M. (2016). TMB: Automatic  
492 Differentiation and Laplace Approximation. *Journal of Statistical Software*, 70(5), 1-21.  
493 <http://dx.doi.org/10.18637/jss.v070.i05>
- 494 Kuk, A. Y. (1989). Double bootstrap estimation of variance under systematic sampling with  
495 probability proportional to size. *Journal of Statistical Computation and Simulation*, 31(2),  
496 73-82.
- 497 Larsen, R. B., Herrmann, B., Sistiaga, M., Brinkhof, J., & Grimaldo, E. (2018). Bycatch reduction  
498 in the Norwegian deep-water shrimp (*Pandalus borealis*) fishery with a double grid  
499 selection system. *Fisheries Research*, 208, 267-273.  
500 <https://doi.org/10.1016/j.fishres.2018.08.007>
- 501 Melli, V., Karlsen, J. D., Feekings, J. P., Herrmann, B., & Krag, L. A. (2018). FLEXSELECT:  
502 counter-herding device to reduce bycatch in crustacean trawl fisheries. *Canadian*  
503 *Journal of Fisheries and Aquatic Sciences*, 75(6), 850-860.  
504 <https://doi.org/10.1139/cjfas-2017-0226>
- 505 Melli, V., Krag, L. A., Herrmann, B., & Karlsen, J. D. (2019). Can active behaviour stimulators  
506 improve fish separation from Nephrops (*Nephrops norvegicus*) in a horizontally divided  
507 trawl codend?. *Fisheries Research*, 211, 282-290.  
508 <https://doi.org/10.1016/j.fishres.2018.11.027>
- 509 Millar, R. B. (1993). Incorporation of between-haul variation using bootstrapping and  
510 nonparametric estimation of selection curves. *Fishery Bulletin*, 91, 564-572.

- 511 Millar, R. B. (1994). Sampling from trawl gears used in sized selectivity experiments. *ICES*  
512 *Journal of Marine Science*, 51(3), 293-298. <https://doi.org/10.1006/jmsc.1994.1030>
- 513 Millar, R. B., & Fryer, R. J. (1999). Estimating the size-selection curves of towed gears, traps,  
514 nets and hooks. *Reviews in Fish Biology and Fisheries*, 9(1), 89-116.  
515 <https://doi.org/10.1023/A:1008838220001>
- 516 Millar, R. B., Broadhurst, M. K., & Macbeth, W. G. (2004). Modelling between-haul variability in  
517 the size selectivity of trawls. *Fisheries Research*, 67(2), 171-181.  
518 <https://doi.org/10.1016/j.fishres.2003.09.040>
- 519 Miller, T. (2013). A comparison of hierarchical models for relative catch efficiency based on  
520 paired-gear data for US Northwest Atlantic fish stocks. *Can. J. Fish. Aquat. Sci.* 70(9),  
521 1306–1316. <https://doi.org/10.1139/cjfas-2013-0136>
- 522 Munro, P. T., & Somerton, D. A. (2001). Maximum likelihood and non-parametric methods for  
523 estimating trawl footrope selectivity. *ICES Journal of Marine Science*, 58(1), 220-229.  
524 <https://doi.org/10.1006/jmsc.2000.1004>
- 525 O'Neill F.G., Kynoch R.J., Blackadder L., Fryer, R.J., Eryaşar A.R., Notti, E., & Sala A. (2016).  
526 The influence of twine tenacity, thickness and bending stiffness on codend selectivity.  
527 *Fisheries Research*, 176, 94–99. <https://doi.org/10.1016/j.fishres.2015.12.012>
- 528 O'Neill, F. G., & Kynoch, R. J. (1996). The effect of cover mesh size and cod-end catch size on  
529 cod-end selectivity. *Fisheries Research*, 28(3), 291-303.  
530 [https://doi.org/10.1016/0165-7836\(96\)00501-2](https://doi.org/10.1016/0165-7836(96)00501-2)
- 531 Özbilgin, H., Tosunoğlu, Z., Tokaç, A., & Metin, G. (2007). Seasonal variation in the trawl  
532 codend selectivity of picarel (*Spicara smaris*). *ICES Journal of Marine Science*, 64(8),  
533 1569-1572. <https://doi.org/10.1093/icesjms/fsm115>
- 534 R Core Team (2020). R: A language and environment for statistical computing. R Foundation for  
535 Statistical Computing, Vienna, Austria. URL <http://www.R-project.org/>.



- 536 Revill, A.S., & Holst, R. (2004) Reducing discards of North Sea brown shrimp (*C. crangon*) by  
537 trawl modification. *Fisheries Research*, 68, 113-122.  
538 <https://doi.org/10.1016/j.fishres.2004.02.001>
- 539 Ryer, C. H., & Barnett, L. A. (2006). Influence of illumination and temperature upon flatfish  
540 reactivity and herding behavior: potential implications for trawl capture efficiency.  
541 *Fisheries Research*, 81(2-3), 242-250. <https://doi.org/10.1016/j.fishres.2006.07.001>
- 542 Santos, J., Herrmann, B., Mieske, B., Stepputtis, D., Krumme, U., & Nilsson, H. (2016).  
543 Reducing flatfish bycatch in roundfish fisheries. *Fisheries Research*, 184, 64-73.  
544 <https://doi.org/10.1016/j.fishres.2015.08.025>
- 545 Santos, J., Herrmann, B., Stepputtis, D., Günther, C., Limmer, B., Mieske, B., and Schultz, S. et  
546 al. (2018). Predictive framework for codend size selection of brown shrimp (*Crangon*  
547 *crangon*) in the North Sea beam-trawl fishery. *PLoS ONE* 13(7): e0200464.  
548 <https://doi.org/10.1371/journal.pone.0200464>
- 549 Savina, E., Krag, L.A., Frandsen, R.P., & Madsen, N. (2017). Effect of fisher's soak tactic on  
550 catch pattern in the Danish gillnet plaice fishery. *Fisheries Research*, 196, 56-65.  
551 <https://doi.org/10.1016/j.fishres.2017.08.009>
- 552 Skalski, J. R., & Perez-Comas, J. (1993). Nonparametric maximum likelihood estimation of  
553 mesh size selectivity. *Fisheries research*, 18(3-4), 321-334.  
554 [https://doi.org/10.1016/0165-7836\(93\)90160-9](https://doi.org/10.1016/0165-7836(93)90160-9)
- 555 Somerton, David A., Weinberg, Kenneth L., Goodman, Scott E., & Chen, Yong. (2013)  
556 Catchability of snow crab (*Chionoecetes opilio*) by the eastern Bering Sea bottom trawl  
557 survey estimated using a catch comparison experiment. *Canadian Journal of Fisheries*  
558 *and Aquatic Sciences*, 70(12), 1699-1708. <https://doi.org/10.1139/cjfas-2013-0100>
- 559 Suuronen, P., & Millar, R. B. (1992). Size selectivity of diamond and square mesh codends in  
560 pelagic herring trawls: only small herring will notice the difference. *Canadian Journal of*  
561 *Fisheries and Aquatic Sciences*, 49(10), 2104-2117. <https://doi.org/10.1139/f92-234>

- 562 Tokai, T., Omoto, S., Sato, R., & Matuda, K. (1996). A method of determining selectivity curve of  
563 separator grid. *Fisheries Research*, 27(1-3), 51-60.  
564 [https://doi.org/10.1016/0165-7836\(95\)00471-8](https://doi.org/10.1016/0165-7836(95)00471-8)
- 565 Veiga-Malta, T., Feekings, J. P., Frandsen, R. P., Herrmann, B., & Krag, L. A. (2020). Testing a  
566 size sorting grid in the brown shrimp (*Crangon Crangon* Linnaeus, 1758) beam trawl  
567 fishery. *Fisheries Research*, 231, 105716. <https://doi.org/10.1016/j.fishres.2020.105716>
- 568 Veiga-Malta, T., Feekings, J., Herrmann, B., & Krag, L. A. (2019). Industry-led fishing gear  
569 development: Can it facilitate the process?. *Ocean & Coastal Management*, 177,  
570 148-155. <https://doi.org/10.1016/j.ocecoaman.2019.05.009>
- 571 Walsh, S. J., & Hickey, W. M. (1993). Behavioural reactions of demersal fish to bottom trawls at  
572 various light conditions. *ICES Mar. Sci. Symp*, 196, 68-76.
- 573 Wienbeck, H., Herrmann, B., Feekings, J. P., Stepputtis, D., & Moderhak, W. (2014). A  
574 comparative analysis of legislated and modified Baltic Sea trawl codends for  
575 simultaneously improving the size selection of cod (*Gadus morhua*) and plaice  
576 (*Pleuronectes platessa*). *Fisheries Research*, 150, 28-37.  
577 <https://doi.org/10.1016/j.fishres.2013.10.007>
- 578 Wileman, D., Ferro, R. S. T., Fonteyne, R., & Millar, R. B. (1996). Manual of methods of  
579 measuring the selectivity of towed fishing gears. *ICES Cooperative Research Report*,  
580 215.  
581  
582

583 Table 1. Symbols

|                                 |                                                                                |
|---------------------------------|--------------------------------------------------------------------------------|
| $N_{i,h,l}$                     | Number of fish caught in compartment $i$ , haul $h$ , in length class $l$      |
| $n_{i,h,l}$                     | Number of fish sampled in compartment $i$ , haul $h$ , in length class $l$     |
| $s_{i,h,l}$                     | Proportion of fish sampled in compartment $i$ , haul $h$ , in length class $l$ |
| $q_{h,l} = s_{i,h,l}/s_{j,h,l}$ | Subsampling ratio for compartment $i$ vs $j$ in haul $h$ , in length class $l$ |
| $r(l)$                          | Retention probability as a function of length $l$                              |
| $p_h$                           | Relative fishing power of test vs control gear in haul $h$                     |
| $\phi_{paired,h,l}$             | Probability model in a paired gear model                                       |
| $\phi_{compare,h,l}$            | Probability model in a catch comparison model                                  |
| $\phi_{covered,h,l}$            | Probability model in a covered codend model                                    |

584

585

586 Table 2. A list of `selfisher` features demonstrated in the four case studies with code  
587 in Appendices 1 through 4 (respectively).

| <b>Feature</b>                           | <b>Demonstrated in case studies</b> |
|------------------------------------------|-------------------------------------|
| Random effects                           | 1, 2                                |
| Fixed effects other than length or size  | 1, 2                                |
| Splines                                  | 3, 4                                |
| Residual plot                            | 1                                   |
| Specifying initial values                | 2                                   |
| Model selection via information criteria | 1, 2                                |
| Link functions other than default logit  | 1                                   |

588

# Appendix 1: Covered codend analyses of four codends catching haddock

4 Dec 2020

This example deals with data from an experiment published by O'Neill et al. (2016) that investigated the selectivity of haddock (*Melanogrammus aeglefinus*) in four codends made from netting materials with different twine bending stiffnesses and mesh sizes. Three of the codends had a nominal mesh size of 120mm and one a nominal mesh size of 130mm. The twine bending stiffness values were in the range 0.64 to 1.1kN  $mm^2$ . We label the codends as 120low, 120med, 120high and 130med to reflect their mesh size and bending stiffness (as categorised by the netting manufacturers). As in the original analysis, we show that selection is dependent on both of these parameters and the total codend catch weight.

## Preliminaries

```
library(selfisher)
library(plyr) #for aggregating data
library(ggplot2); theme_set(theme_bw())
library(parallel) #for bootstrapping in parallel
library(bbmle) #for AICtab BICtab
library(splines)
library(reshape)
```

## Data structure

We load the data each row of which corresponds to the fish of a given length from a given haul. The length (cm), haul number, mesh size (mm), twine bending stiffness ( $kNmm^2$ ), number of fish measured from the codend, codend raising factor, number of fish measured from the cover, cover raising factor, catch size (kg) and codend label are specified respectively.

```
data("coverhaddock")
head(coverhaddock)
```

```
##   Length haul  mesh stiffness codend cod_rf cover cov_rf catch  gear
## 1   10.5   36 119.3    0.69     0     1     0   1.00   617 120low
## 2   11.5   36 119.3    0.69     0     1     0   1.00   617 120low
## 3   12.5   36 119.3    0.69     0     1     0   1.00   617 120low
## 4   13.5   36 119.3    0.69     0     1     1   4.78   617 120low
## 5   14.5   36 119.3    0.69     0     1     4   4.78   617 120low
## 6   15.5   36 119.3    0.69     0     1    12   4.78   617 120low
```

Here we can see that the raising factor varied by length class, which is not a problem in `selfisher`.

```
summary(coverhaddock)
```

```
##      Length      haul      mesh      stiffness
## Min.   :10.5   Min.   : 6.0   Min.   :119.3   Min.   :0.6400
## 1st Qu.:21.5   1st Qu.:13.0   1st Qu.:119.3   1st Qu.:0.6900
## Median :33.0   Median :22.5   Median :119.6   Median :0.8000
```

```
## Mean :33.0 Mean :22.0 Mean :122.5 Mean :0.8087
## 3rd Qu.:44.5 3rd Qu.:31.0 3rd Qu.:129.4 3rd Qu.:0.8000
## Max. :55.5 Max. :39.0 Max. :129.4 Max. :1.1000
## codend cod_rf cover cov_rf
## Min. : 0.00 Min. :1.000 Min. : 0.00 Min. : 1.000
## 1st Qu.: 0.00 1st Qu.:1.000 1st Qu.: 0.00 1st Qu.: 1.000
## Median : 0.00 Median :1.000 Median : 3.00 Median : 2.580
## Mean : 11.89 Mean :1.349 Mean : 24.82 Mean : 3.437
## 3rd Qu.: 5.00 3rd Qu.:1.701 3rd Qu.: 38.00 3rd Qu.: 4.097
## Max. :156.00 Max. :2.989 Max. :272.00 Max. :59.330
## catch gear
## Min. :267.0 120high:322
## 1st Qu.:482.0 120low :368
## Median :535.5 120med :276
## Mean :556.7 130med :414
## 3rd Qu.:630.0
## Max. :979.0
```

We can also see that all the hauls are contained in one data frame. The data is organized into what is called “long format”.

## Transforming data

For a model in `selfisher`, we need to convert counts into proportions and totals. Unlike other GLM functions for binomial regression, it is **not** possible to specify the binomial variable as a two-column response variable, e.g. `cbind(N_test, N_cover)`.

Because not all fish in the samples were counted, we will account for this in the model (Millar 1994). The values we need in the model are calculated as `cov_rf/cod_rf`. If instead we had a sampling fraction, we would calculate `qratio = sampling_test/sampling_cover` because a sampling fraction is the inverse of a raising factor. We create a new column in the data with the value of `qratio = cov_rf/cod_rf` for each row. An easy way to compute this value by row is to use the `transform` function.

```
coverhaddock = transform(coverhaddock,
  total = codend + cover,
  prop = codend / (codend+cover),
  qratio = cov_rf / cod_rf)
```

We drop rows of data where no fish were observed because they don’t contain any information (i.e. where `total = 0`). This doesn’t affect the model except to allow for bootstrapping later.

```
coverhaddock = subset(coverhaddock, !is.na(prop))
```

## Single gear model with covered codend

We will start out with a simple example of one gear type (“120low”). So we need to subset the data.

```
coverhaddock_120low = subset(coverhaddock, gear=="120low")
```

The following is a model for multiple haul data from a covered codend experiment with subsampling. It could be argued that there should be a random effect of haul in the models to account for variation among hauls and avoid pseudoreplication, but we will keep it simple for this first example and only include a fixed effect of length.

```
mod_base = selfisher(prop ~ Length, qratio=qratio, total=total, haul=haul, data=coverhaddock_120low)
```

## Extracting residuals and other standard methods

We can check the model residuals for patterns. There's a `residuals` function for `selfisher` models. All methods for `selfisher` models can be displayed as follows:

```
methods(class="selfisher")
```

```
## [1] anova      confint      df.residual extractAIC  family      fitted
## [7] fixef       getME        logLik       model.frame nobs        predict
## [13] print      ranef        residuals     simulate    summary     terms
## [19] VarCorr     vcov
## see '?methods' for accessing help and source code
```

Here is one way to plot the residuals.

```
coverhaddock_120low$res = residuals(mod_base, type="deviance")
ggplot(coverhaddock_120low, aes(Length, res, colour=factor(haul)))+geom_point()
```

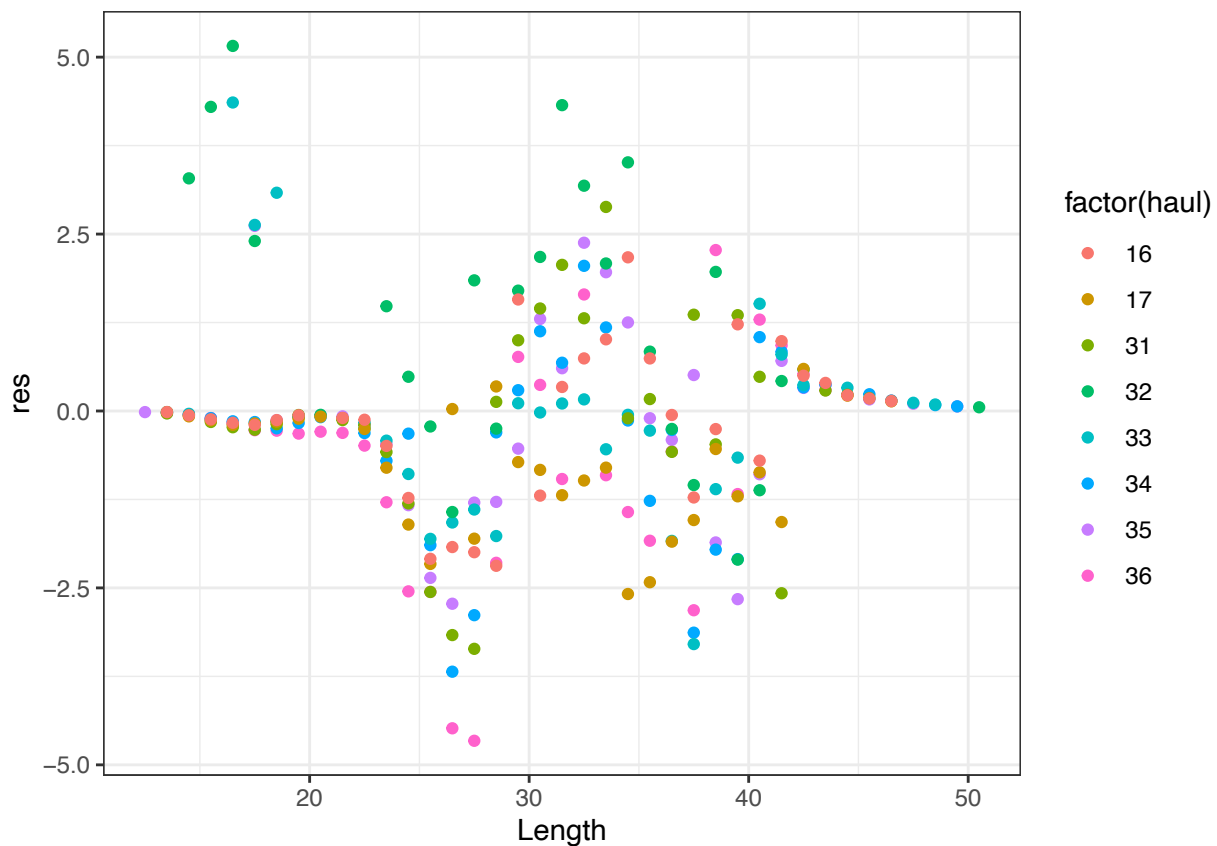

Residuals from GLMs are notoriously opaque, but in the future, we will try to make `selfisher` compatible with the `DHARMA` package to make it easier to assess residuals (Hartig 2020).

## Links other than logit

It is also possible to consider other link functions, or use a spline. See the function documentation (`?selfisher`) for a list of implemented link functions. Here we fit the logistic, probit and Richard's curve and a spline.

```
mod_probit = selfisher(prop ~ Length, qratio=qratio, total=total,
  link="probit", haul=haul, coverhaddock_120low)
```

```
mod_richards = selfisher(prop ~ Length, qratio=qratio, total=total,
```

```
link="richards", haul=haul, coverhaddock_120low)
```

```
## Warning in nlminb(start = par, objective = fn, gradient = gr, control =  
## optControl): NA/NaN function evaluation
```

```
## Warning in nlminb(start = par, objective = fn, gradient = gr, control =  
## optControl): NA/NaN function evaluation
```

```
mod_spline = selfisher(prop ~ bs(Length, 3), qratio=qratio, total=total,  
haul=haul, coverhaddock_120low)
```

Fitting the model with link="richards" produced some warnings, but this is ok. The model is valid if the summary function is able to produce non-NA standard-errors as seen below.

```
summary(mod_richards)
```

```
## Family: binomial ( Richards )  
## Selectivity formula:      prop ~ Length  
## Data: coverhaddock_120low  
## Total: total  
##  
##           AIC           BIC       logLik      deviance Pearson.ChiSq  
##          953.2          963.9        -473.6         491.9         22746.8  
##      df.resid  
##           255  
##  
##  
## Richards exponent parameter (delta): 0.542  
##  
## Selectivity model:  
##           Estimate Std. Error z value Pr(>|z|)  
## (Intercept) -11.65570    0.64953  -17.95  <2e-16 ***  
## Length      0.35000    0.01549   22.60  <2e-16 ***  
## ---  
## Signif. codes:  0 '***' 0.001 '**' 0.01 '*' 0.05 '.' 0.1 ' ' 1  
##  
## Size at retention probability:  
##      p  Lp.Est Lp.Std.Err  
## 1 0.25 32.98060 0.05570708  
## 2 0.50 35.54755 0.07331880  
## 3 0.75 38.38777 0.15044341  
##  
## Selectivity range (SR):  
##      Estimate Std. Error  
## 5.4071721  0.1568771
```

## Predictions

To see how the model fits the data, in addition to residuals as above, it helps to plot observations and predictions together. This could be done to examine any of the models above. We could have compared them using log-likelihoods or information criteria, but we'll demonstrate how to do that in the next section.

```
newdata = expand.grid(Length=unique(coverhaddock_120low$Length),  
total=1,  
haul=NA,  
qratio=1)
```



```
newdata$prop = predict(mod_base, newdata=newdata, type="response")
```

For plotting observations, we need to aggregate the hauls and raise the data by the raising factor. The raised data is only used for plotting, not for statistical analyses.

```
sumdat_base = ddply(coverhaddock_120low, ~Length, summarize,  
  prop = sum(codend)/sum(total),  
  total = sum(total),  
  raised_prop = sum(codend * cod_rf)/  
    sum(codend * cod_rf + cover* cov_rf),  
  raised_total=sum(codend * cod_rf + cover* cov_rf)  
)
```

```
ggplot(sumdat_base, aes(Length, prop))+  
  geom_point(aes(size=total, y=raised_prop))+  
  geom_line(data=newdata)+  
  ylab("retention probability")
```

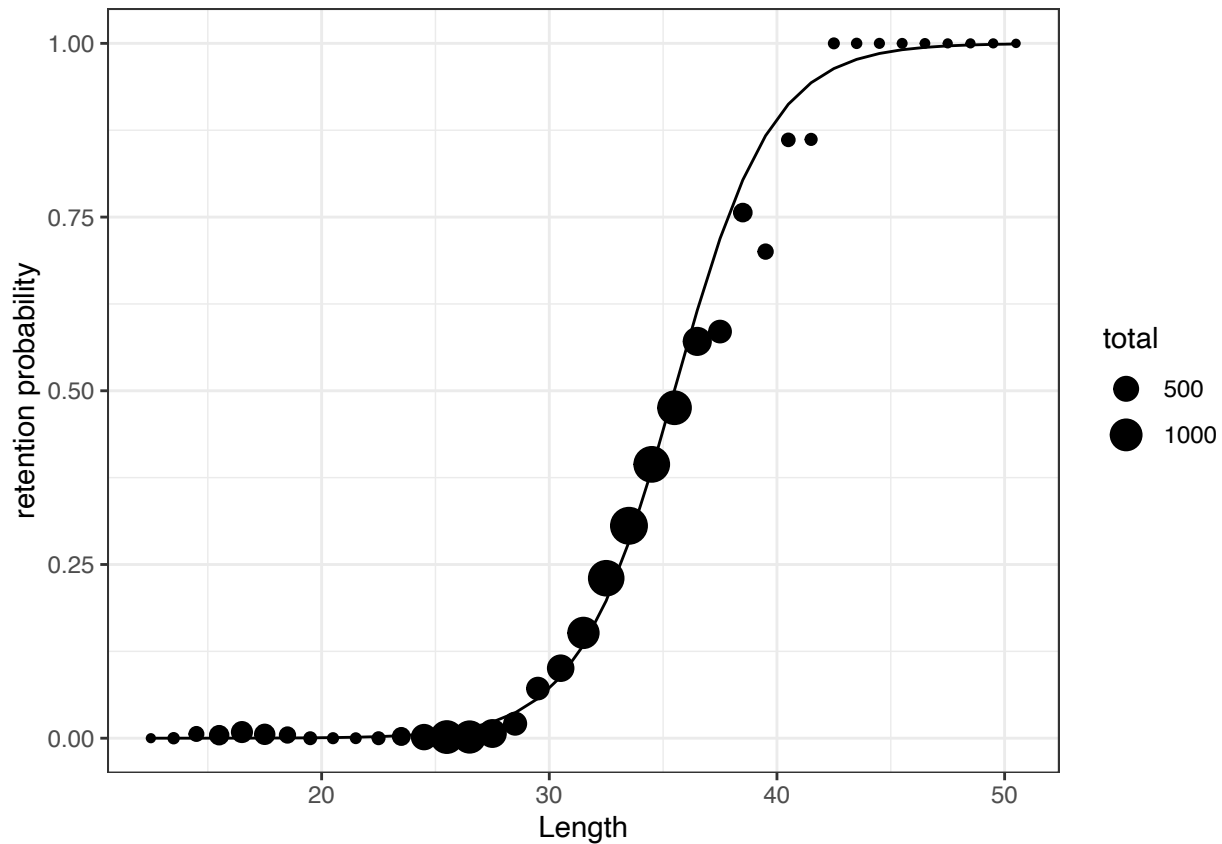

## Confidence intervals by bootstrapping

Following the method of Millar (1994) the bootstrapping function `bootSel` resamples hauls, then resamples fish within hauls, fits the model to the resampled data, then applies a function `FUN` to each fitted model. In the code below, we define `FUN` to make predictions from each fitted model onto `newdata`. The type of predictions we want in this case are the retention probabilities, i.e. the estimated selection curve, so we specify `type="selection"`. To read about the `predict` function, type `?predict.selfisher` in the R console.

## Mac and Linux bootstrapping in parallel

```
bs = bootSel(mod_base, nsim=1000, parallel="multicore", ncpus=4,  
  FUN=function(mod){predict(mod, newdata=newdata, type="selection")})
```

## Windows bootstrapping in parallel

```
ncpus = 4  
cl = makeCluster(rep("localhost", ncpus))  
clusterExport(cl, "newdata")  
bs = bootSel(mod_base, nsim=1000, parallel = "snow", cl=cl,  
  FUN=function(mod){predict(mod, newdata=newdata, type="selection")})  
stopCluster(cl)
```

Then we calculate quantiles across bootstraps for each row of newdata.

```
quants = apply(bs$t, 2, quantile, c(0.025, 0.5, 0.975))  
newdata[,c("lo", "mid", "hi")] = t(quants)
```

```
ggplot(sumdat_base, aes(Length, prop))+geom_point(aes(size=total, y=raised_prop))+  
  geom_line(data=newdata)+  
  geom_ribbon(data=newdata, aes(ymin=lo, ymax=hi), alpha=0.2)+  
  ylab("Retention probability")
```

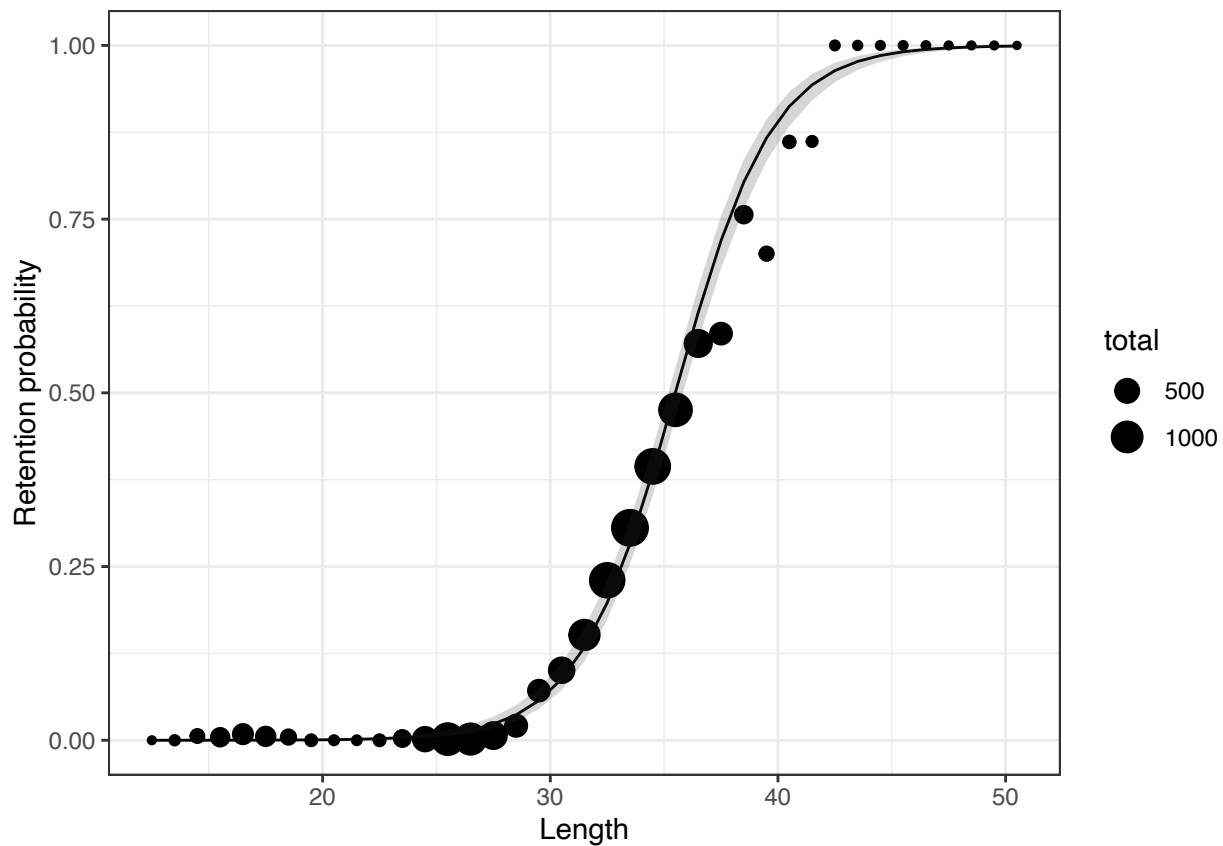

## All four codends in one model

We can analyze the data from all gear types together and test if the gear type affects selectivity by comparing models of varying complexity. If we want to use models directly (i.e. before bootstrapping) for testing the significance of a variable, we need to account for variability among hauls and avoid pseudoreplication (Hurlbert 1984) by including a random effect of haul. The random effect is only needed when models are used directly for hypothesis testing e.g. here, to test our hypothesis that the gear types differ in their selectivity.

```
mod0 = selfisher(prop ~ Length + (1|haul), qratio=qratio, total=total, coverhaddock)
mod1 = selfisher(prop ~ Length * gear + (1|haul), qratio=qratio, total=total, coverhaddock)
```

```
BICtab(mod0, mod1)
```

```
##          dBIC df
## mod1    0.0  9
## mod0   16.8  3
```

We use the Bayesian information criterion (BIC) to choose the best fit and this table tells us that `mod1` is more parsimonious, which means that the 4 codends are somehow different. To explore which aspect of the gears made them different, we examine models with mesh size, twine bending stiffness and catch size. Further, we assume that Baranov's Principle Of Geometric Similarity applies, i.e. selectivity is a function of fish length scaled by mesh size. It could also be reasonable to fit models with a main effect of mesh size and length in addition to an interaction term, but we do not attempt to fit all possible models here and leave it to users to decide what applies to their particular study.

```
mod_all = selfisher(prop ~ Length + (1|haul),
  qratio=qratio, total=total, haul=haul, data=coverhaddock)

mod_all_c = selfisher(prop ~ Length + catch + (1|haul),
  qratio=qratio, total=total, haul=haul, data=coverhaddock)

mod_all_s = selfisher(prop ~ Length + stiffness + (1|haul),
  qratio=qratio, total=total, haul=haul, data=coverhaddock)

mod_all_m = selfisher(prop ~ I(Length/mesh) + (1|haul),
  qratio=qratio, total=total, haul=haul, data=coverhaddock)

mod_all_c_s = selfisher(prop ~ Length + catch + stiffness + (1|haul),
  qratio=qratio, total=total, haul=haul, data=coverhaddock)

mod_all_c_m = selfisher(prop ~ I(Length/mesh) + catch + (1|haul),
  qratio=qratio, total=total, haul=haul, data=coverhaddock)

mod_all_s_m = selfisher(prop ~ I(Length/mesh) + stiffness + (1|haul),
  qratio=qratio, total=total, haul=haul, data=coverhaddock)

mod_all_c_s_m = selfisher(prop ~ I(Length/mesh) + catch + stiffness + (1|haul),
  qratio=qratio, total=total, haul=haul, data=coverhaddock)

BICtab(mod_all, mod_all_c, mod_all_s, mod_all_m, mod_all_c_s, mod_all_c_m, mod_all_s_m,
  mod_all_c_s_m)
```

```
##          dBIC df
## mod_all_c_s_m  0.0  5
## mod_all_s      3.6  4
## mod_all_s_m    9.4  4
```

```
## mod_all_c_s    10.4 5
## mod_all       17.6 3
## mod_all_c     23.4 4
## mod_all_m     24.9 3
## mod_all_c_m   29.5 4
```

Again we use BIC to choose the best fit and this table tells us that the model that contains mesh size, twine bending stiffness and catch size is the most parsimonious fit to the data.

## Bootstrapping

We drop the random effect of haul from the most parsimonious model before bootstrapping for two reasons (1) the bootstrapping method resamples among and within hauls and thereby accounts for variation among hauls, and (2) random effects make model fitting much slower which can be burdensome when refitting the model 1000 times or more.

```
mod_all_c_s_m_FE = selffisher(prop ~ I(Length/mesh) + catch + stiffness,
  qratio=qratio, total=total, haul=haul, data=coverhaddock)
```

Then we create a new data set to use for predictions. It must include all variables that appear in the model. Even though haul is not used in the mathematics behind the predictions, it must be included in the new data for technical reasons. We include gear just because it makes it easy to organize and plot the data further down. For each gear, we will make predictions over the range of catch weights observed for that gear.

```
newdata_v2 = unique(coverhaddock[,c("Length", "stiffness", "mesh", "gear", "catch")])

newdata_v2 = transform(newdata_v2,
  qratio=1,
  total=1,
  haul=NA)
```

## Windows bootstrapping code

```
ncpus = 4
cl = makeCluster(rep("localhost", ncpus))
clusterExport(cl, "newdata")
bs = bootSel(mod_all_c_s_m_FE, nsim=1000, parallel = "snow", cl=cl,
  FUN=function(x){predict(x, newdata= newdata_v2, type="selection")})
stopCluster(cl)
```

## Mac and linux bootstrapping code

```
bs= bootSel(mod_all_c_s_m_FE, nsim=1000, parallel = "multicore", ncpus = 4,
  FUN=function(x){predict(x, newdata= newdata_v2, type="selection")})
```

## Organize bootstrap predictions with the predictor variables

Then we organize the bootstrap results and join them with the newdata used for predictions.

```
quants = apply(bs$t, 2, quantile, c(0.025, 0.5, 0.975))

newdata_v2[,c("lo", "mid", "hi")] = t(quants)

#all the bootstrap predictions with the variables used to create them
newdata_v3 = cbind(newdata_v2[,c("Length", "gear", "mesh", "stiffness", "catch")], t(bs$t))
```

```
#put them in long format (i.e. separate the different bootstrap replicates)
newdata_v3 = melt(newdata_v3, id.vars=1:5)

names(newdata_v3)[6:7] = c("rep", "predicted_r")
```

## Calculate $l_{50}$ and $SR$ from bootstraps

Here we define a function to evaluate the length at which a given proportion of fish ( $p$ ) are retained using interpolation. We use this function to find the  $l_{50}$  and  $SR$  for each bootstrap while varying over mesh size, twine bending stiffness and catch size and subsequently find the mean  $l_{50}$ , mean  $SR$  and their 95% confidence limits. We plot the results against catch size, which is how they were presented in the original analysis of O'Neill et al (2016).

```
# Function to interpolate lengths - assumes y strictly increases with x
findx=function(x,y,p=0.5) {
  n=length(x)
  lo.obs=sum(y<p)
  hi.obs=lo.obs+1
  delta=(p-y[lo.obs])/(y[hi.obs]-y[lo.obs])
  x[lo.obs]+delta*(x[hi.obs]-x[lo.obs])
}

#find l50 and SR for each bootstrap, still varying by gear characteristics and catch
sums0 = ddply(newdata_v3, ~gear + mesh + stiffness + catch + rep,
  summarize, SR = findx(Length, predicted_r, 0.75) - findx(Length, predicted_r , 0.25),
  l50 = findx(Length, predicted_r, 0.5)
)

#summarize over bootstraps, but still varying by gear characteristics and catch
sums1 = ddply(sums0, ~gear + mesh + stiffness + catch , summarize,
  l50_lo=quantile(l50, 0.025),
  l50_mid=quantile(l50, 0.5),
  l50_hi=quantile(l50, 0.975),
  SR_lo=quantile(SR, 0.025),
  SR_mid=quantile(SR, 0.5),
  SR_hi=quantile(SR, 0.975)
)

ggplot(sums1, aes(x=catch, group=gear))+
  geom_line(aes(y=l50_mid, lty=gear))+
  geom_ribbon(aes(ymin=l50_lo, ymax=l50_hi), alpha=0.1)+
  ylab(expression(l[50]))
```

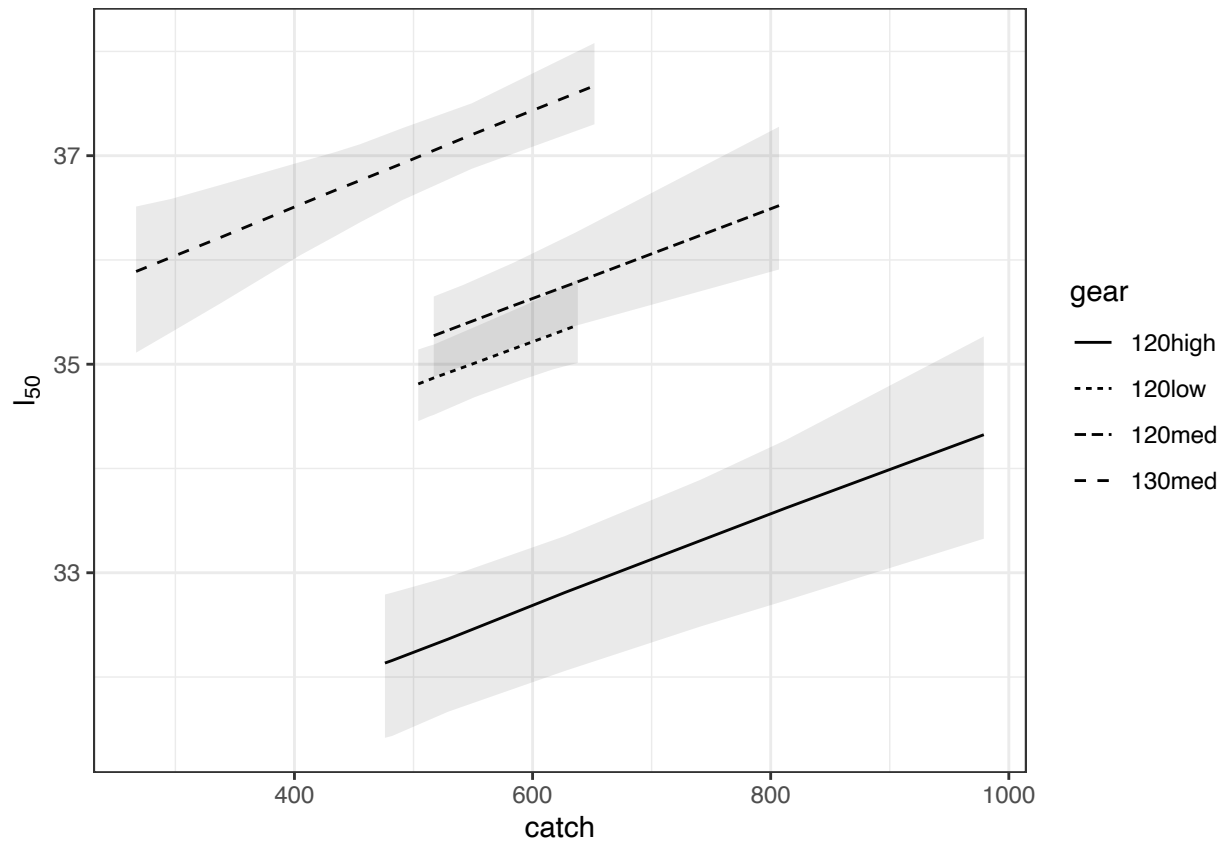

```
ggplot(sums1, aes(x=catch, group=gear))+  
  geom_line(aes(y=SR_mid, lty=gear))+  
  geom_ribbon(aes(ymin=SR_lo, ymax=SR_hi), alpha=0.1)+  
  ylab("SR")
```

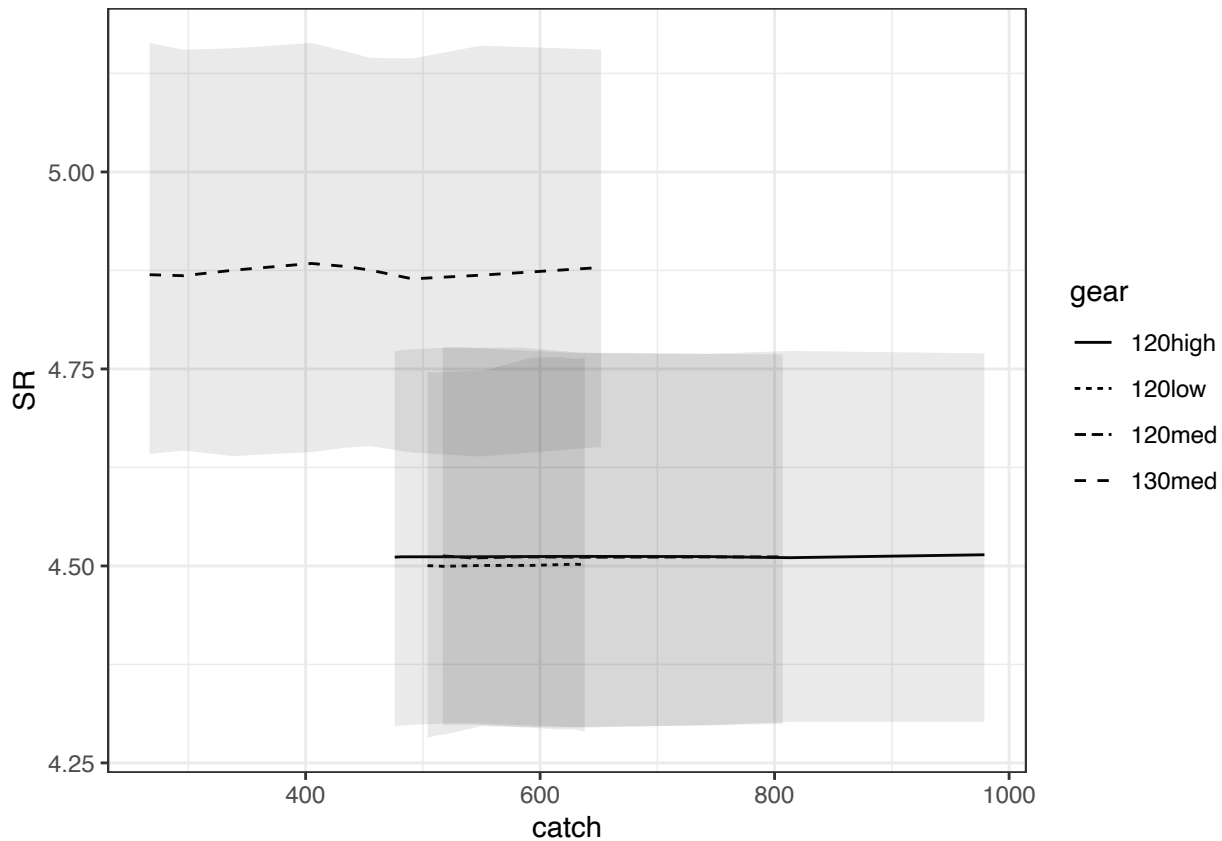

The plots presented here are very comparable to Fig 1 from the original manuscript, which finds a similar dependence of haddock  $l_{50}$  on mesh size, twine bending stiffness and total codend catch weight but finds that  $SR$  is a constant (O'Neill et al., 2016). We should not, however, expect the results to be identical as there are many differences between the analyses. In the original, it was assumed that the slope and intercept of the logistic link functions vary randomly from haul to haul and that  $l_{50}$  and  $\log SR$  mean selection curve were linearly dependent on the explanatory variables. Whereas, here we have assumed geometric similarity and that overall retention is related to the explanatory variables.

Below we plot retention curves for each gear aggregated over catches.

```
sumdat = ddply(coverhaddock, ~Length+gear, summarize,
  prop=sum(codend)/sum(total), total=sum(total),
  raised_prop=sum(codend * cod_rf)/sum(codend * cod_rf + cover* cov_rf),
  raised_total=sum(codend * cod_rf + cover* cov_rf)
)

newdata_v4 = ddply(newdata_v3, ~Length + gear + mesh + stiffness, summarize,
  lo = quantile(predicted_r, 0.025),
  mid = quantile(predicted_r, 0.5),
  hi = quantile(predicted_r, 0.975)
)

ggplot(sumdat, aes(colour=gear))+geom_point(aes(size=total, x=Length, y=raised_prop))+
  geom_line(data=newdata_v4, aes(x=Length, y=mid))+
  geom_ribbon(data=newdata_v4, aes(x=Length, ymin=lo, ymax=hi, fill=gear), alpha=0.2)+
  ylab("retention probability")
```

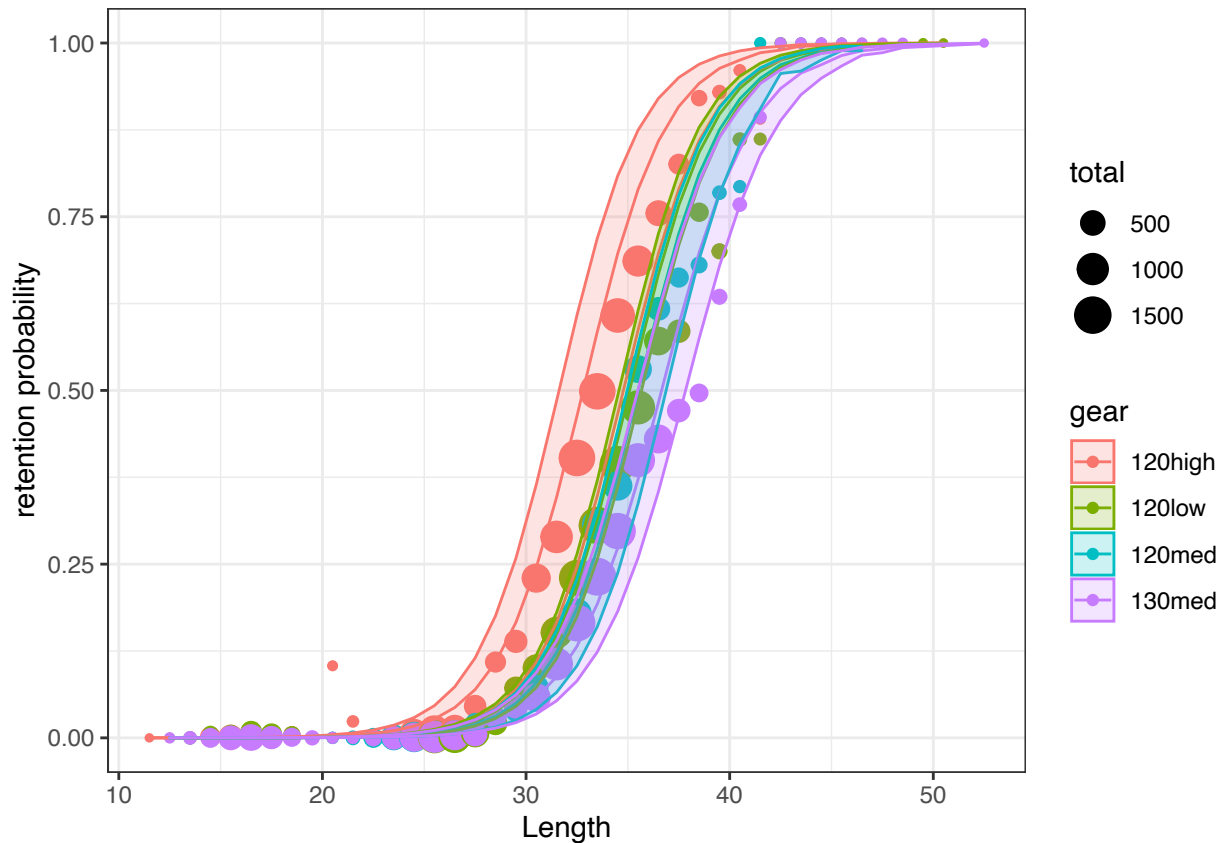

## References

Hartig F. (2020). DHARMA: Residual Diagnostics for Hierarchical (Multi-Level / Mixed) Regression Models. R package version 0.2.7. <https://CRAN.R-project.org/package=DHARMA>

Hurlbert S.H. (1984) Pseudoreplication and the design of ecological field experiments. *Ecol. Monogr.* 54:187–211.

O'Neill F.G., Kynoch R.J., Blackadder L., Fryer, R.J., Eryasar A.R., Notti, E., and Sala A., 2016. The influence of twine tenacity, thickness and bending stiffness on codend selectivity. *Fisheries Research.* 76, 94-99.

Millar R.B. (1994) Sampling from trawl gears used in sized selectivity experiments, *ICES Journal of Marine Science*, 51:293–298, <https://doi.org/10.1006/jmsc.1994.1030>



## Appendix 2: Paired gear analysis of codend selectivity dependent on mesh size

12 Nov 2020

### Case study background

This example deals with brown shrimp selectivity data from Santos et al. (2018). The brown shrimp beam-trawl fishery is one of the most important fisheries in the Southern North Sea. Despite its relevance, this is also one of the least regulated fisheries in European waters. Concerns regarding the size selection of the fishery motivated the German research project *CRANNET* (2013-2015), which assessed brown shrimp size selection of commercially used and alternative codend designs. Codend selectivity data was collected during experimental fishing trials using the paired gear method (Millar and Walsh, 1992; Wileman, 1996). The experimental method consisted of fishing with two identical beam trawls, simultaneously and in parallel on the same shrimp population. One of the trawls mounted a small-mesh (11 mm) control codend with very limited selectivity (assumed to be non-selective) on the range of shrimp lengths available for the trawl. The second trawl mounted, one at a time, a total of 33 different test codend designs varying in mesh size and mesh type were tested.

This case study draws on a subset of the *CRANNET* data to demonstrate the use and functionality of `selfisher` in selectivity analysis based on paired gear data. It uses a subset of the catch data, the 87 hauls during which 13 diamond-mesh codends varying in mesh size (ranging from 19.1 mm to 36.3 mm) were tested. Additional information relative to fishing conditions and catch characteristics were recorded at haul level.

### Preliminaries

```
library(selfisher)
library(xtable)
library(bbmle)
library(ggplot2); theme_set(theme_bw())
```

### Data structure

We can read in the data that is distributed with the package and examine it.

```
data(pairedshrimp)
head(pairedshrimp)
```

| ##   | length | ms     | cw     | seast | test | control | sampling_test | sampling_control | haul |
|------|--------|--------|--------|-------|------|---------|---------------|------------------|------|
| ## 1 | 23     | 20.188 | 12.074 | 4     | 0    | 1       | 0.232         | 0.182            | 1    |
| ## 2 | 24     | 20.188 | 12.074 | 4     | 1    | 1       | 0.232         | 0.182            | 1    |

```
## 3      26 20.188 12.074      4  0      1      0.232      0.182  1
## 4      28 20.188 12.074      4  0      2      0.232      0.182  1
## 5      29 20.188 12.074      4  0      3      0.232      0.182  1
## 6      30 20.188 12.074      4  2      1      0.232      0.182  1
```

Here we can see the column names of the data. There is a column for `haul` because multiple hauls  $h$ ,  $i = 1, 2, \dots, 87$  are contained in the same data object. Therefore the information presented in the remaining columns was collected at haul level. The column `length` contains observed (total) length classes  $l$  of brown shrimp (mm), `ms` contains the measured mesh size (mm) of the test codend, `cw` is the total catch weight (kg) collected in the test codend, `seast` is the state of the sea recorded during towing (Beaufort scale). Columns `test` and `control` contain the numbers of shrimps of length  $l$  sampled from each of the paired codends, while `sampling_test` and `sampling_control` are the associated sampling fractions.

## Data transformation

In `selfisher`, it is necessary to model the binomial response as a proportion and total because unlike many other methods for binomial GLMs, the underlying code does not accept a two column response variable. Therefore, we transform the data to create these new columns. We also create a column for `qratio` (i.e.  $q_h$  below) which is the ratio of the sampling fraction of the test over the control gear. If the data contained raising factors instead, then `qratio` would be the raising factor of the control gear over the test gear.

```
pairedshrimp = transform(pairedshrimp, total = test + control,
                          qratio = sampling_test / sampling_control,
                          prop = test / ( test + control )
)
```

## Selectivity analysis

The selectivity analysis based on paired gear data is usually done with the model introduced by Millar and Walsh (1992):

$$\phi(l) = \frac{p * r(l)}{(1.0 - p) + p * r(l)}$$

In the equation above,  $\phi(l)$  expresses the probability that a shrimp of length  $l$  in the total catch of the paired gear was caught by the test gear. This probability is related to a sequence of two fishing events. The first event is controlled by the probability that a shrimp entering the paired gear did it through the test trawl (relative fishing power), expressed as the length-independent split parameter  $p$ . Conditioned on the probability of entering the test trawl, the second event is the length-dependent retention probability of the test codend  $r(l)$ . Retention probability is usually (but not exclusively) modelled with the logistic function, and summarized by two selectivity parameters  $L_{50}$  (length of 50% retention probability) and  $SR$  (difference in the lengths of 75% and 25% retention). Further details of this model and extensions involving alternatives to the logistic function can be found in Millar and Walsh (1992) and Wileman (1996).

In Santos *et al.* (2018), the effect of codend design as well as other variables describing catch and operational characteristics of the hauls were assessed using the so-called Fryer method (Fryer,

1991). The Fryer method is carried out in two steps. In the first step the parameters  $l_{50}$ ,  $SR$ ,  $p$  and associated Hessian-based covariance-variance matrix of individual hauls are estimated. The estimates become the data used in the second step, where the effect of the measured explanatory variables (fixed effects) on codend selectivity is estimated. Such estimations are obtained using the EM-algorithm, which allows quantifying the strength of the fixed effects in the presence of between-haul variation.

The Fryer method was developed at a time before suitable generalized mixed modeling software such as **selfisher** was available. The Fryer method suffers from small sample bias in the fits to individual haul data. In contrast, **selfisher** enables quantifying and testing the effect of explanatory variables in a single step and directly on the measured catch data.

The methods in **selfisher** generalize the original selectivity model introduced by Millar and Walsh (1992), by allowing multiple fixed and random effects to simultaneously model relative fishing efficiency and the selectivity of the test codend:

$$\phi_{h,l} = \frac{q_h p_h r_{h,l}}{(1.0 - p_h) + q_h p_h r_{h,l}}$$

In the equation above,  $q_h = \frac{s_{t,h}}{s_{c,h}}$  is the ratio of the fraction of brown shrimp sampled in the test gear to the fraction sampled in the control gear,  $p_h$  is the relative fishing power of the test gear in haul  $h$  (split parameter), where  $p_h = \text{logit}^{-1}(\mu + u_h)$  and  $u_h$  is a random effect  $u_h \sim N(0, \sigma_u^2)$  accounting for haul-specific random variation from the mean value on the logit scale  $\mu$ . For simplicity in this example, we assume a logit link in the retention model and therefore the retention probability model for haul  $h$  and length  $l$  is  $r_{h,l} = \text{logit}^{-1}(y_{h,l}) = \frac{\exp(y_{h,l})}{1 + \exp(y_{h,l})}$ . This expresses the haul-specific probability for a fish entering in the test gear to be retained where  $y_{h,l}$  is the expectation on the link scale combining fixed- and random-effects potentially influencing retention probability of the test codend. Four models varying in the structure of  $y_{h,l}$  are initially considered:

$$\begin{aligned} \text{model 1 : } & y_{h,l} = \beta_0 + a_h + (\beta_1 + \tau_h) * l \\ \text{model 2 : } & y_{h,l} = \beta_0 + a_h + (\beta_1 + \tau_h) * l + \beta_2 * ms_h \\ \text{model 3 : } & y_{h,l} = \beta_0 + a_h + (\beta_1 + \tau_h) * l + \beta_2 * ms_h + \beta_3 * l * ms_h \\ \text{model 4 : } & y_{h,l} = \beta_0 + a_h + (\beta_1 + \tau_h) * l / ms_h \end{aligned}$$

All models listed above include an intercept  $\beta_0$  which expresses the baseline shrimp retention log-odds when all additional covariates (including shrimp length) are set to 0. The coefficient  $a_h$  is a random effect  $a_h \sim N(0, \sigma_a^2)$  accounting for haul-specific random variation of the intercept. Model 1 assumes that codend retention can be exclusively described by shrimp length. In models 1, 2, and 3,  $\beta_1$  is the slope quantifying the rate of increment in retention probability (on the link scale) due to increments in the length of shrimp. The slope of size selection curves can vary significantly and randomly between hauls, even while keeping the design characteristics of the codend constant (Fryer, 1991). The coefficient  $\tau_h \sim N(0, \sigma_\tau^2)$  is introduced to account for haul-specific random variation of the baseline  $\beta_1$  value. Model 2 extends model 1 by adding mesh size ( $ms$ ) as a fixed effect that varies by haul:  $ms_h$ . Model 2 assumes that retention probability is a result of separate effects of shrimp length and mesh size. With the addition of an interaction term of mesh size and shrimp length ( $\beta_3$ ), in model 3 it is assumed that mesh size influences both the position and slope of the size selection curve.

The tested diamond-mesh codends were made of the same netting material, same length, and the number of meshes in circumference were reduced proportionally to increments in mesh size. Therefore, we assume that the meshes of the tested codends present the same geometry during fishing. Based on the principle of geometrical similarity (Baranov, 1948; Millar and Holst, 1997; Revill and Holst, 2004) it would be a reasonable *a priori* assumption that the selection curves will vary systematically with mesh size. Model 4 is built upon the hypothesis that variation in size selection can be explained by the principle of geometrical similarity, implying that the size selection varies proportionally to mesh size (i.e. doubling the mesh size implies doubling the values of  $l_{50}$  and  $SR$  of the selection curve)(Millar and Holst, 1997).

## Model fitting with selfisher

In this section, the models described above are fit using a function named `selfisher` within the `selfisher` package. Formulas in these models follow the convention of the `lme4` and `glmmTMB` packages. The function takes a formula for the retention model `rformula` as the first argument. This is a two sided model with the proportion on the left side and fixed and random effects on the right side. For example, in model 1 (`m1`) below, `prop ~ length + ( length | haul )` says that the proportion (`prop`) of fish retained in the test gear depends on `length` and that the intercept and slope vary randomly by haul. It also takes an argument for the relative fishing power model (`pformula`) which is a one-sided formula, e.g. `pformula =~( 1 | haul )`; this says that relative fishing power should be estimated and can vary randomly by haul. If instead, we wanted to fix the split at 0.5, then we could specify `pformula =~0`. To tell the function that this is a paired gear model with one non-selective gear, we use the argument `psplit = TRUE`. The function also takes as arguments the names of the columns for the `total` and `qratio` within the data frame specified by the argument `data`.

One optional argument appears in this example: the `start` argument. It tells the function what starting values to use in maximum likelihood estimation. See `?selfisher` for the full flexibility of how to specify starting values, but here we only give starting values for the retention model. To get good starting values for the retention model's intercept ( $\beta_0$  above) and coefficient on `length` ( $\beta_1$  in models 1, 2, and 3 above), we use the `inits` function which takes guesses for  $l_{50}$  and  $SR$  as its arguments (30 and 8 respectively here). The coefficient  $\beta_1$  has a different meaning in model 4, but the starting values work as supported by plots below, so it's not a problem. Models fit with TMB (as in `selfisher`) are usually robust to starting values, but due to the complexity of paired gear models, they sometimes get stuck in local minima during maximum likelihood estimation. In this case study, the length of the `start` vector must equal the number of fixed effects coefficients in the retention model, i.e. the  $\beta$ s in the equations above, so in `m2` and `m3` we combine guesses for  $\beta_0$  and  $\beta_1$  with zeros for the other coefficients

As described above, model 4 (`m4`) assumes geometric similarity. To include `length/ms` in a model in R, it is necessary to tell the formula interface to use the term "as is" by putting an `I()` around it.

```
m1 = selfisher( prop ~ length + ( length | haul ),
               total = total, psplit = TRUE, pformula =~( 1 | haul ),
               qratio = qratio, data = pairedshrimp, start = c(inits(30,8))
             )

m2 = selfisher( prop ~ length + ms + ( length | haul ),
               total = total, psplit = TRUE, pformula =~( 1 | haul ),
```

```
      qratio = qratio, data = pairedshrimp, start = c(inits(30,8),0)
    )

m3 = selfisher( prop ~ length * ms + ( length | haul ),
  total = total, psplit = TRUE, pformula =~( 1 | haul ),
  qratio = qratio, data = pairedshrimp, start = c(inits(30,8),0,0)
)

m4 = selfisher( prop ~ I( length/ms ) + ( I( length/ms ) | haul ),
  total = total, psplit = TRUE, pformula =~( 1 | haul ),
  qratio = qratio, data = pairedshrimp, start = c(inits(30,8))
)
```

## Model selection

Retention is a mechanical process that can be largely explained by the relationship between the mesh characteristics and the morphology of the species being selected. Of the above models, model 4 is the only one that has a mechanistic justification, namely geometric similarity. In terms of model selection we *a priori* propose model 4, taking the view that strong evidence against model 4 is required to prefer an alternative. There are several thousand observations in the data, and consequently Akaike Information Criterion will tend to choose the most complicated model (Heinze *et al.*, 2018). In contrast, the Bayesian Information Criterion, BIC, includes a stronger penalty for the number of parameters than AIC and therefore it tends to select simpler models than AIC. We can use functions from the `bbmle` package to create either an AIC or BIC table of the models.

```
AICtab(m1, m2, m3, m4)
```

```
##      dAIC df
## m4   0.0  7
## m3   0.2  9
## m2   7.5  8
## m1  96.6  7
```

```
BICtab(m1, m2, m3, m4)
```

```
##      dBIC df
## m4   0.0  7
## m3  13.1  9
## m2  13.9  8
## m1  96.6  7
```

Both AIC and BIC rank model 4 on top, as was the *a priori* expectation.

## Extended models

Model 4 is now extended by adding other covariates in the data frame that could potentially influence size selection, such as `cw` and `seast`. The following models are fitted following the same procedure as for models 1 to 4:

```
m5 = selfisher( prop ~ I( length/ms ) + cw + ( I( length/ms ) | haul ),
  total = total, psplit = TRUE, pformula =~( 1 | haul ),
  qratio= qratio, data = pairedshrimp, start = c(inits(30,8),0)
)

m6 = selfisher( prop ~ I( length/ms ) + seast + ( I( length/ms ) | haul ),
  total = total, psplit = TRUE, pformula =~( 1 | haul ),
  qratio= qratio, data = pairedshrimp, start = c(inits(30,8),0)
)

m7 = selfisher( prop ~ I( length/ms ) + cw + seast + ( I( length/ms ) | haul ),
  total = total, psplit = TRUE, pformula =~( 1 | haul ),
  qratio = qratio, data = pairedshrimp, start = c(inits(30,8),0,0)
)

m8 = selfisher( prop ~ I( length/ms ) + cw * seast + ( I( length/ms ) | haul ),
  total = total, psplit=TRUE, pformula =~( 1 | haul ),
  qratio = qratio, data = pairedshrimp, start = c(inits(30,8),0,0,0)
)
```

Then we can compare all the models.

```
BICtab(m1, m2, m3, m4, m5, m6, m7, m8)
```

```
##      dBIC df
## m4   0.0  7
## m5   2.4  8
## m6   8.3  8
## m7   8.6  9
## m8  13.0 10
## m3  13.1  9
## m2  13.9  8
## m1  96.6  7
```

This table shows that none of the individual or combined effects associated with `cw` and `seast` were strong enough to be included in the most parsimonious model. Therefore model 4 is selected in this case study for further assessments.

## Simple results

Consistent with other model procedures implemented in R, a summary of model results and fit statistics can be obtained via `summary(model.object)`. Before inspecting the size selectivity results provided by model 4, the estimated relative fishing efficiency of the test gear is presented. By default, `selfisher()` summary shows the estimated split parameter  $p$  on the logit scale, but this might be updated in a new version. An inverse logit transformation is needed to obtain the fishing power  $p \in [0, 1]$ :

```
round(boot::inv.logit(confint(m4, level=0.95, component="p")[1,c( 1, 3, 2 )]),3)
```

```
##      2.5 % Estimate      97.5 %
```

```
##      0.484      0.503      0.522
```

The split parameter estimated by model 4 is  $p = 0.503$  with 95% confidence interval (0.484 – 0.522), very close to the value estimated in the original study ( $p = 0.492$  (0.472 – 0.512)). This includes the reference value of 0.5, from which we conclude that there is no significant evidence against equal catch efficiency of the test and control gears.

## Goodness-of-fit

The mixed models presented above are fitted at haul level. Therefore it is reasonable to assess the goodness-of-fit of these models on individual haul data. Due to the large dataset used, a random sample of 12 hauls are picked to demonstrate how well the  $\phi(l)$  curves estimated by model 4 fit to the data. We can use the function `predict` to examine the estimated retention curve, ie. the model’s “response” variable. See `?predict.selfisher` for details of how to use this function including the different types of predictions available.

```
pairedshrimp$hat_phi = predict( m4, type = "response" )

set.seed( 999 )

ggplot(pairedshrimp[pairedshrimp$haul%in%sample(unique(pairedshrimp$haul),12),],
  aes(x=length,y=prop))+
  ylab( eval( parse( text = paste0("expression(", "phi", "(l)") ) ) ) )+
  xlab( "Shrimp length (mm)" )+
  xlim( 20, 80 )+
  geom_point( alpha = .7, size = 0.3 )+
  geom_line( aes( x = length, y = hat_phi ) )+
  facet_wrap( ~ haul, ncol = 4, nrow = 3)+
  theme_bw()
```

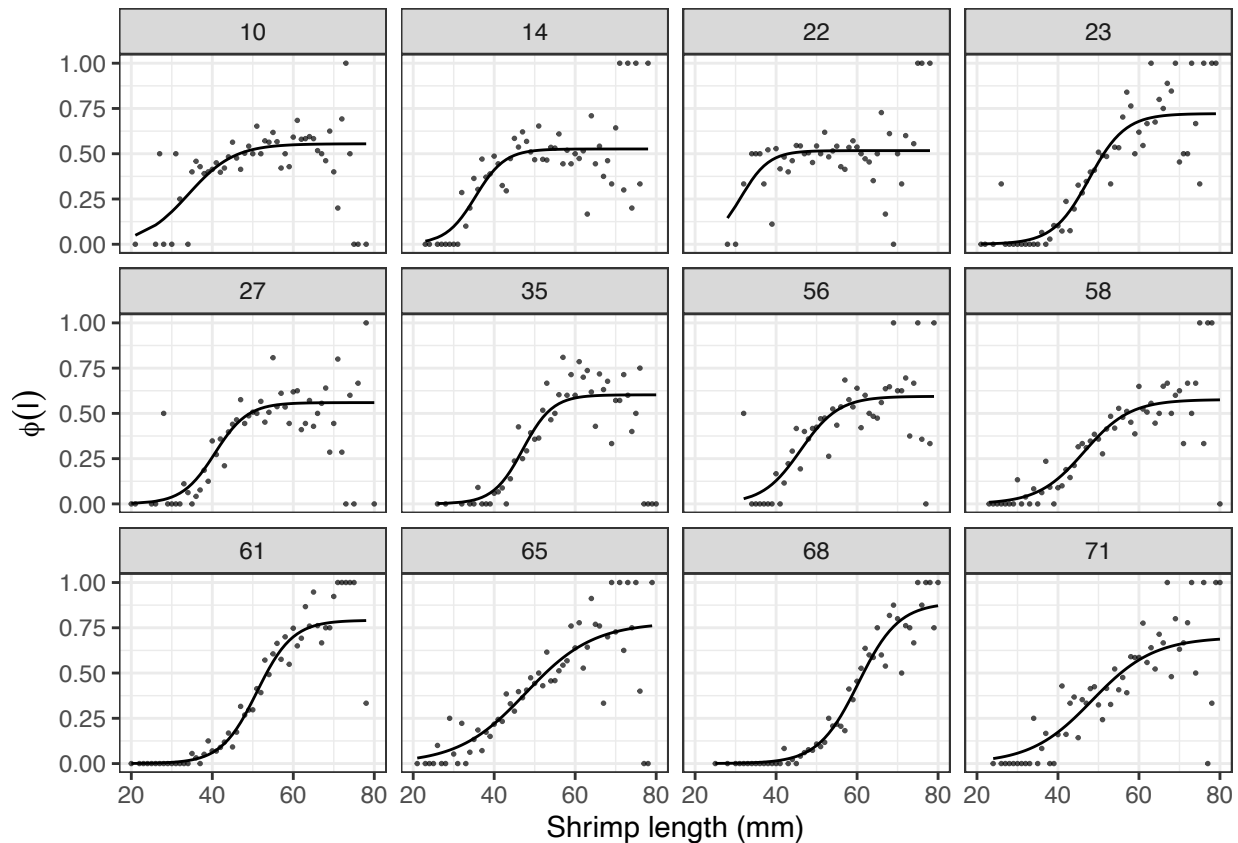

The figure above reveals that the fitted  $\phi(l)$  curves describe well the trends and variability of the data at individual haul level.

## Population-average predictions

Mixed modelling is a formal procedure that takes into account specific details of the data collection enabling sound hypothesis testing on fixed effects and model selection. However, fitting mixed models can be a computational-intensive task. Moreover, the researcher is also typically interested in obtaining average selectivity predictions, as these are relevant to the selectivity applied to the fishery. It is therefore recommended to refit the best candidate model leaving out the random effects. Bootstrapping can then be used to obtain valid standard errors and confidence intervals for estimated quantities such as  $l_{50}$  and  $SR$ .

```
m4_fe = selfisher( prop ~ I( length/ms ), total = total,
                  psplit = TRUE, pformula = ~1, haul = haul,
                  qratio = qratio, data = pairedshrimp, start = c( inits( 30, 8 ) ) )
```

A summary of model coefficients describing codend retention can be obtained using standard procedures in R

```
coef( summary( m4_fe ) )$r
```

```
##           Estimate Std. Error   z value Pr(>|z|)
## (Intercept) -9.231103 0.09420144 -97.99322    0
## I(length/ms)  5.143515 0.06443302  79.82732    0
```



## Bootstrapping to get confidence intervals on population-average $l_{50}$ and $SR$

Selectivity statistics  $l_{50}$  and  $SR$  are often obtained by simple calculations involving model coefficients  $\beta_0$  and  $\beta_1$ , or for simple models in `selfisher`, the function `L50SR(model.object)` can calculate them. However, standard calculations need to be updated when using multiple fixed effects to describe codend retention. Details on how to calculate  $l_{50}$  and  $SR$  from the models considered in this case study can be found in Table 1 below.

To obtain a bootstrap distribution of the selectivity parameters estimated by model 4, first we generate a bootstrap distribution of model coefficients using `bootSel()`, as follows. The `bootSel()` function applies the user-defined function `FUN` to each refit model; here we define `FUN` so that it returns the fixed effect (`fixef`) coefficients of the retention model (`$r`). This is the code to perform the computations in parallel on Linux or Mac computers, but see the other case studies for how to do it in Windows.

```
bootpars_m4_fe = bootSel( m4_fe, nsim = 1000,
                          parallel = "multicore", ncpus = 4,
                          FUN = function( x ){fixef( x )$r }
)
```

Selectivity statistics  $l_{50}$  and  $SR$  are then calculated from each set of coefficients in the bootstrap distribution generated above. Finally, the resulting bootstrap distribution is used to obtain 95% percentile confidence intervals of  $l_{50}$  and  $SR$ .

```
# extract bootstrap distribution from bootSel object
bootpars = bootpars_m4_fe$t

# create a grid of mesh sizes within the experimental range for predictions
ms = seq( from = 20, to = 35, by = .5 )

# calculate bootstrap distribution of l50 based on model coefficients
## l50 = -m * beta_0 / beta_1 (see table 3)
L50_boot = apply( bootpars, 1, function( x ){ -ms * x[1] / x[2] } )

# get Efron confidence intervals for l50
L50_ci = t( apply( L50_boot, 1, quantile, c( 0.025, 0.5, 0.975 ) ) )

# create a data frame for plotting
L50_df = data.frame( mesh_size = ms )

L50_df [, c("lower_limit", "median", "upper_limit" )] = L50_ci

# calculate bootstrap distribution of SR based on model coefficients
## SR = m*log(9) / beta_1 (see table 3)
SR_boot = apply( bootpars, 1, function( x ){ ms * log(9) / x[2] } )

# get Efron confidence intervals for SR
SR_ci = t( apply( SR_boot, 1, quantile, c( 0.025, 0.5, 0.975 ) ) )

# create a data frame for plotting SR
```

```
SR_df = data.frame( mesh_size = ms )
```

```
SR_df[, c( "lower_limit", "median", "upper_limit" )] = SR_ci
```

The following figure compares the predictions of  $l_{50}$  and  $SR$  estimated by model 4, with those from Santos et al. (2018). The black points in the figure represent values of  $l_{50}$  and  $SR$  estimated at haul level, and used in the original study as input data. Average predictions for  $l_{50}$  and estimation uncertainty (expressed in the amplitude of the confidence band) by model 4 are equivalent to those from the original study. Model 4 predicted higher values of  $SR$ , with larger uncertainty than Santos et al. (2018). This is a plausible result considering the different model structures applied, and the large variation of the by-haul estimates. Moreover, there is not statistical evidence to reject the possibility that the true value of  $SR$  could fall within the continue region of confidence bands overlap.

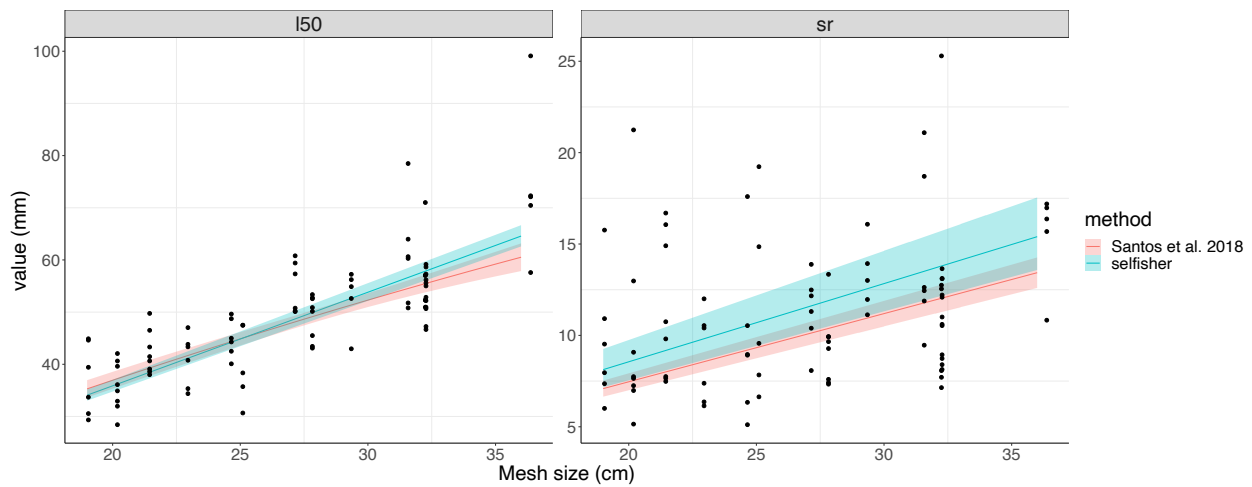

| model | $l_{50}$                                                      | $SR$                                     |
|-------|---------------------------------------------------------------|------------------------------------------|
| 1     | $\frac{-\alpha}{\beta_1}$                                     | $\frac{\log(9)}{\beta_1}$                |
| 2     | $\frac{-(\alpha + \beta_2 * ms)}{\beta_1}$                    | $\frac{\log(9)}{\beta_1}$                |
| 3     | $\frac{-(\alpha + \beta_2 * ms)}{\beta_1 + \beta_3 * ms}$     | $\frac{\log(9)}{\beta_1 + \beta_3 * ms}$ |
| 4     | $\frac{-\alpha * ms}{\beta_1}$                                | $\frac{\log(9) * ms}{\beta_1}$           |
| 5-8   | $\frac{-(\alpha + \sum_{i=2}^p \beta_i * x_i) * ms}{\beta_1}$ | $\frac{\log(9) * ms}{\beta_1}$           |

Table 1: Calculations to obtain selectivity parameters from population-average models 1-8 (fitted leaving out the random effects). Note that the last row for models 5-8 is the extension of model 4 to include additional covariates  $x_i, i = 2, \dots, p$ .

## References

- Baranov, F. 1948. Theory and assessment of fishing gear. Pishchepromisdat, Moscow.
- Fryer, R. 1991. A model of between-haul variation in selectivity. ICES Journal of Marine Science, 48: 281–290. Oxford University Press.
- Heinze, G., Wallisch, C., and Dunkler, D. 2018. Variable selection—a review and recommendations for the practicing statistician. Biometrical Journal, 60: 431–449. Wiley Online Library.
- Millar, R., and Walsh, S. 1992. Analysis of trawl selectivity studies with an application to trouser trawls. Fisheries Research, 13: 205–220. Elsevier.
- Millar, R. B., and Holst, R. 1997. Estimation of gillnet and hook selectivity using log-linear models. ICES Journal of Marine Science, 54: 471–477. Oxford University Press.
- Revill, A. S., and Holst, R. 2004. Reducing discards of north sea brown shrimp (c. Crangon) by trawl modification. Fisheries Research, 68: 113–122. Elsevier.
- Santos, J., Herrmann, B., Stepputtis, D., Günther, C., Limmer, B., Mieske, B., and Schultz, S. *et al.* 2018. Predictive framework for codend size selection of brown shrimp (crangon crangon) in the north sea beam-trawl fishery. PloS one, 13: e0200464. Public Library of Science San Francisco, CA USA.
- Wileman, D. A. 1996. Manual of methods of measuring the selectivity of towed fishing gears. ICES Coop. Res. Rep., 215: 1–126.

## Appendix 3: Catch comparison on unpaired hauls

07 Dec 2020

This example deals with data from an experiment originally published by Savina et al. (2017). Two soak tactics, i.e., 12h at day and 12h at night, were compared in the Danish gillnet plaice fishery to estimate whether a change in soak tactics could help to catch less of the unwanted bycatch, i.e., the invertebrate edible crab (*Cancer pagurus*). The method developed by Herrmann et al. (2017) for assessing the relative length-dependent catch efficiency effect of changing from soak tactic *Day* to *Night* was used. This example is representative of experimental fishing where the catch data obtained for two different gear designs were not collected in pairs, and can allow for a different number of deployments.

### Preliminaries

```
library(selfisher)
library(plyr) # for aggregating data across hauls
library(ggplot2); theme_set(theme_bw())
library(splines) # for bs function
```

### Data structure

Load the data and check out the variables. This is a subset of the original dataset (one species, two soak durations). The data contains the length measurement of each individual to the nearest mm below (carapace width), as specified in the column “width”. Every day for 7 days (I to VII), three fleets (each consisting of three gillnets tied together, and labelled A, B and C) were soaked for 12 h during the day (*Day*) and three others during the night (*Night*). Each deployment of a fleet is considered as a “haul” (with haul name written as Day\_Soak\_Fleet). Gear unit design is the soak tactic, specified in the column “tactic”, with two levels: 12h at day (*Day*) and 12h at night (*Night*). “total” gives the number of individuals for each length class and haul. There was no sub-sampling.

```
data("compcrab")
head(compcrab)
```

```
## # A tibble: 6 x 4
##   width haul      tactic total
##   <dbl> <fct>    <fct> <int>
## 1  58.5 VII_Night_B Night     1
## 2  63.5 VI_Night_B  Night     1
## 3  64.5 I_Night_B   Night     1
## 4  66.5 VII_Day_A   Day       1
## 5  69.5 VII_Night_B Night     1
## 6  70.5 VI_Night_B  Night     1
```

```
summary(compcrab)
```

```
##      width      haul      tactic      total
## Min.   : 58.5 VII_Night_A: 49 Day :117 Min.   :1.000
## 1st Qu.: 99.5 VI_Night_B : 38 Night:446 1st Qu.:1.000
## Median :115.5 V_Night_B : 34      Median :1.000
```

```
## Mean      :117.2   VII_Night_B: 33           Mean      :1.181
## 3rd Qu.   :133.5   V_Night_A  : 28           3rd Qu.   :1.000
## Max.     :197.5   I_Night_B  : 27           Max.     :5.000
##                (Other) :354
```

Here we can see that all hauls are contained in one data frame, organized into what is called “long format”, with *Day* and *Night* one after the other (unpaired).

## Transforming data

For a model in `selfisher`, we need to convert counts into proportions and totals. We use the ‘`ddply`’ function to calculate the proportion of fish entering one of the gear design (here *Night*) for each length class and haul, i.e., 1 for *Night* and 0 for *Day*.

```
dat = ddply(compcrab, ~width+haul+tactic, mutate,
            prop = as.numeric(tactic == "Night")
            )
```

## Catch comparison

The following is a typical model for catch comparison of multiple haul data without subsampling using spline with the `bs` function.

```
mod = selfisher(prop ~ bs(width, df = 3), total = total, haul = haul, pool = tactic, data = dat)
```

This models the proportion of fish in *Night* versus *Day* (`prop`) as a function of `width`. The `selfisher` function takes the `total` number of fish in *Day* and *Night* using a separate argument, `total`. The argument `haul` needs to be specified in order to perform double-bootstrapping as demonstrated below. Otherwise, it could be omitted from the model specification as it doesn’t affect the fit. The `haul` argument tells the software how to group the data for resampling in the bootstrapping procedure. `pool` represents the different pools of hauls, i.e., one for each soak tactic, that is used in double bootstrap to produce same number of hauls by pool. Indeed, because the catch data obtained for *Day* and *Night* were not collected in pairs (and may not have the same total number of deployments), we sum data of the deployments carried out with *Day*, and data of the deployments carried out with *Night*.

Then we create a new data set to make predictions on.

```
newdata = expand.grid(width = unique(dat$width),
                    total = 1,
                    haul = 0,
                    tactic = NA) #not used as a predictor, so it doesn't matter

newdata$prop = predict(mod, newdata = newdata, type = "response")
```

## Bootstrap to get CI on predictions

The code below runs in parallel on Mac and Linux computers as written here, but a Windows version was given above. This call to the function `bootSel` predicts the response variable based on the model `mod` and the covariates in `newdata`. Then we calculate the quantiles of the bootstrapped response variable, and transform the proportion into a catch ratio.

```
bs = bootSel(mod, nsim = 100, parallel = "multicore", ncpus = 4,
            FUN = function(mod){predict(mod, newdata = newdata, type = "response")})

quants = apply(bs$t, 2, quantile, c(0.025, 0.5, 0.975))
newdata[,c("lo", "mid", "hi")] = t(quants)
```

```
bs$CR = bs$t/(1-bs$t)
CRquants = apply(bs$CR, 2, quantile, c(0.025, 0.5, 0.975))
newdata[,c("CRlo", "CRmid", "CRhi")] = t(CRquants)
```

## Plot predictions

For plotting, we need to aggregate the hauls.

```
sumdat = ddply(dat, ~width, summarize,
  prop = sum(total*prop)/sum(total),
  total = sum(total),
  CR = sum(prop)/sum(1-prop)
)

ggplot(sumdat, aes(width, prop))+geom_point(aes(size=total))+
  geom_line(data = newdata)+
  geom_ribbon(data = newdata, aes(ymin = lo, ymax = hi), alpha = 0.2)+
  ylab("Catch comparison rate")
```

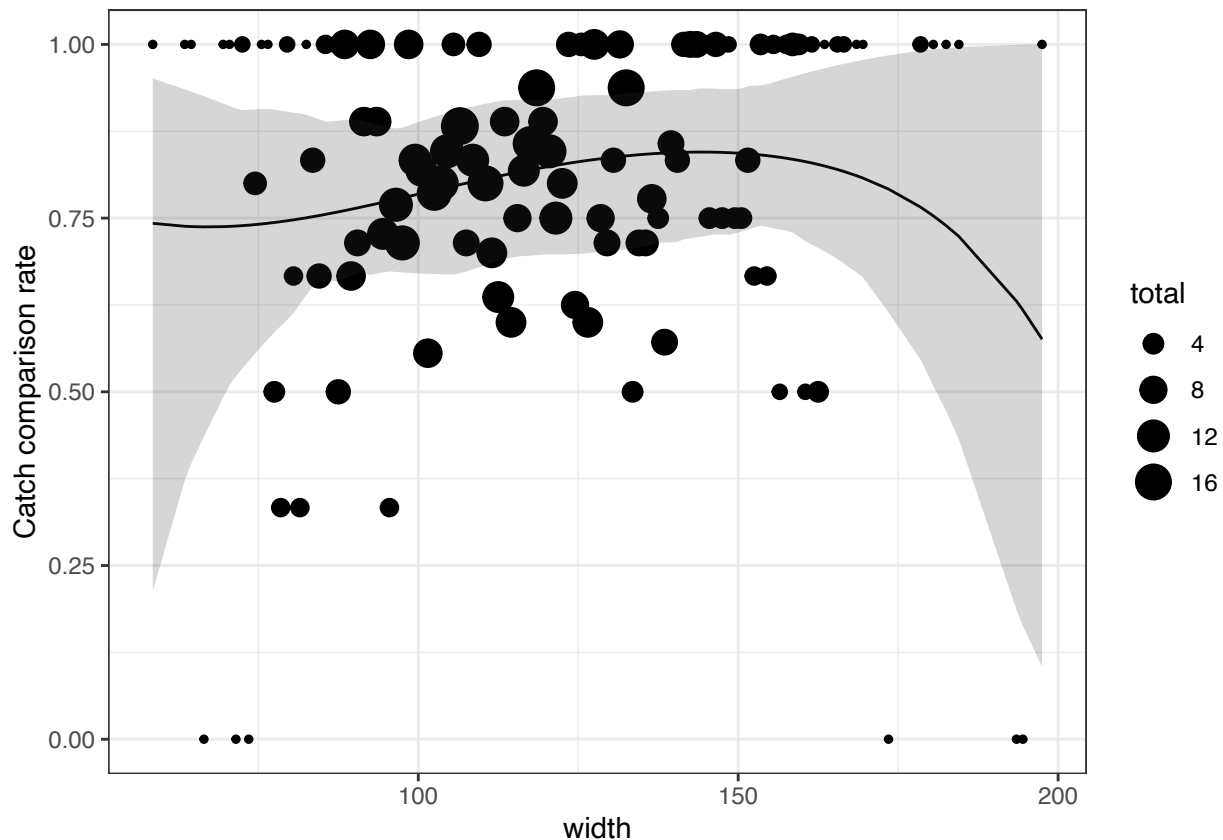

A graphical comparison to the published results in Savina et al. (2017; in red) shows that the estimated catch comparison curves and relative CIs are very similar.

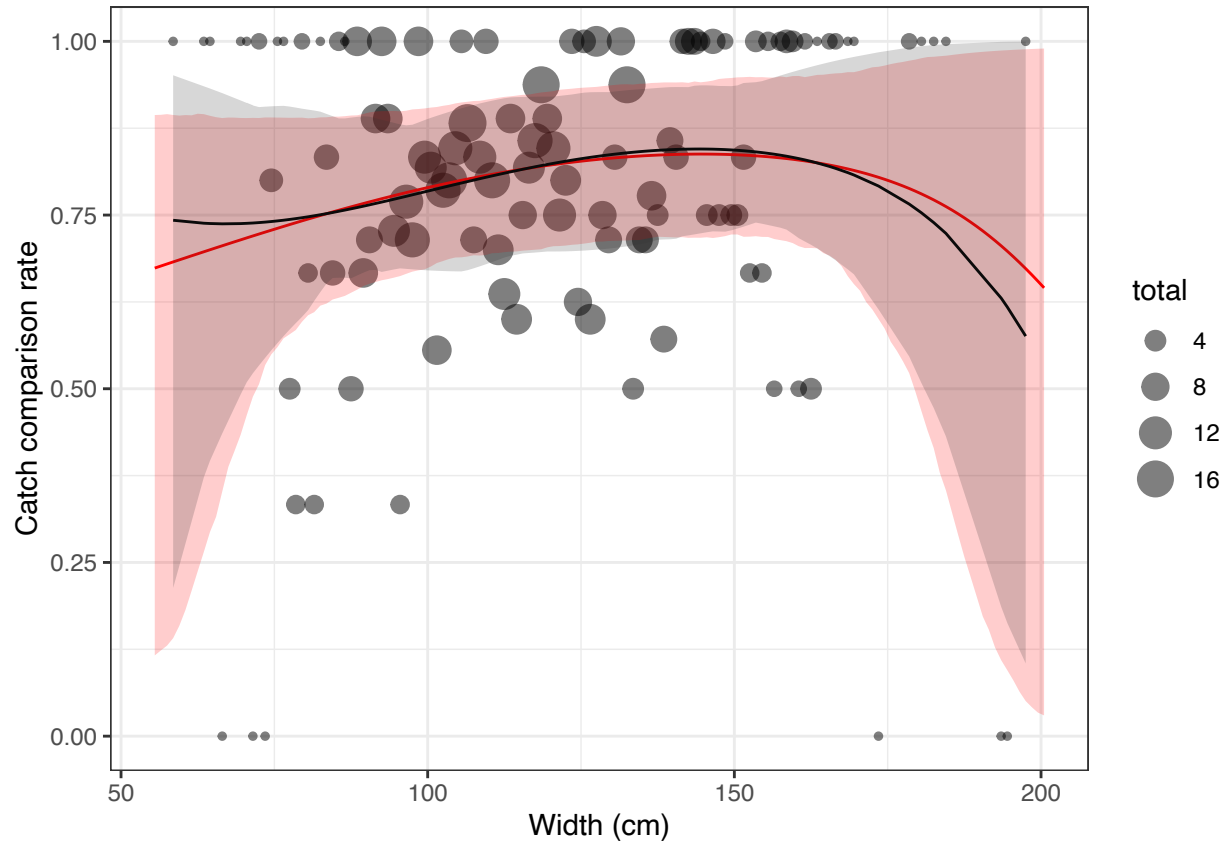

```
ggplot(sumdat, aes(width, prop/(1-prop))) + geom_point(aes(size = total))+  
geom_line(data = newdata)+  
geom_ribbon(data = newdata, aes(ymin = CRlo, ymax = CRhi), alpha = 0.2)+  
ylab("Catch ratio rate")+  
coord_cartesian(ylim = c(0,8))
```

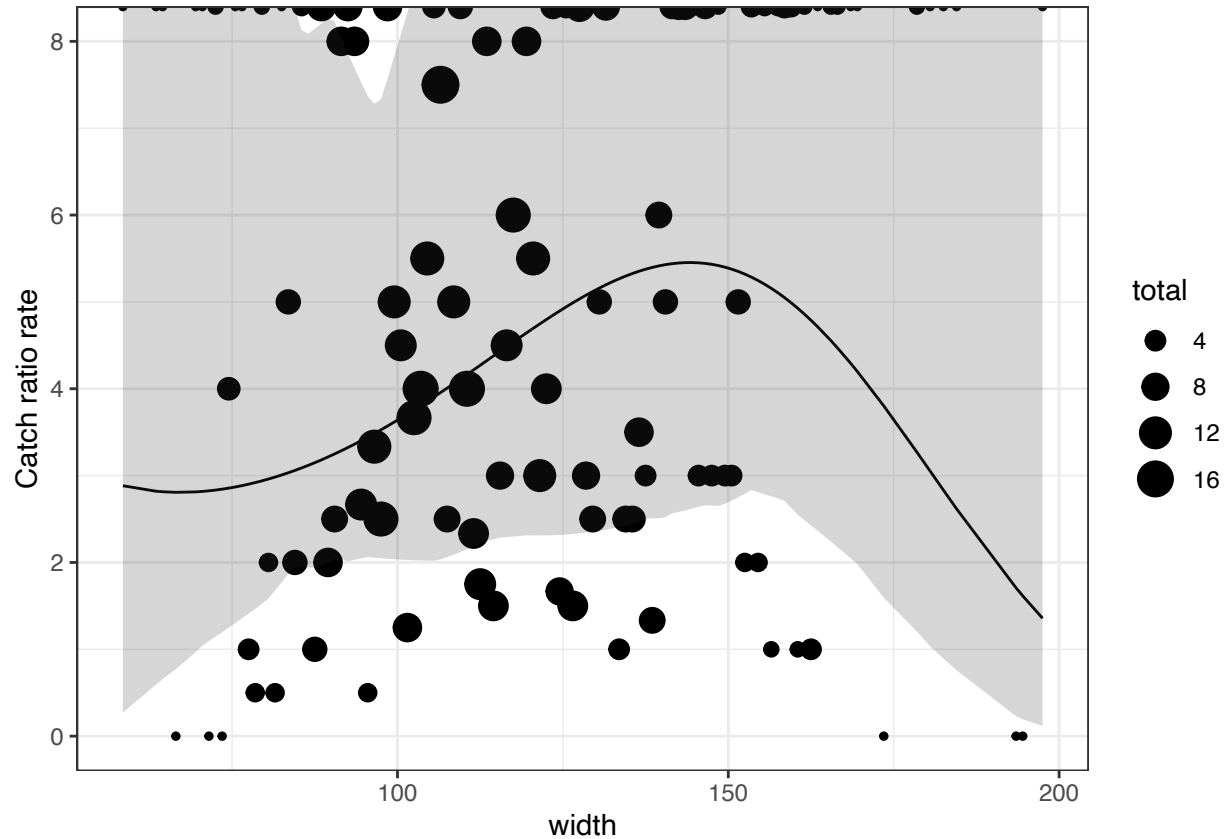

The catch comparison curves properly reflected the trend in the experimental points. The experimental rates were subject to increasing binomial noise outside the length classes representing the main bulk of the catches. The results for edible crab showed significantly higher catches for 12 h at night compared to 12 h at day. On average, there were four times more catches for 12 h at night than 12 h at day. There was no strong indication of a length dependency in the data.

## References

- Herrmann, B., Sistiaga, M., Rindahl, L., Tatone, I. (2017). Estimation of the effect of gear design changes on catch efficiency: methodology and a case study for a Spanish longline fishery targeting hake (*Merluccius merluccius*). *Fisheries Research*, 185, 153-160.
- Savina, E., Krag, L.A., Frandsen, R.P., and Madsen, N. (2017). Effect of fisher's soak tactic on catch pattern in the Danish gillnet plaice fishery. *Fisheries Research*, 196, 56-65.



## Appendix 4: Catch comparison analyses of paired hauls of *Nephrops* twin-rigged trawls

7 Dec 2020

This example is based on the data from Melli et al. (2018). An anterior gear modification, namely the counter-herding device FLEXSELECT, was tested in a twin-rig configuration, where two identical bottom trawls were towed in parallel. One trawl was equipped with FLEXSELECT, while the other worked as baseline. The aim of the study was to determine if FLEXSELECT could prevent fish species from entering the trawl in a *Nephrops* (*Nephrops norvegicus*) fishery. Data for haddock *Melanogrammus aeglefinus* were collected for 21 hauls. Of these, 13 were conducted in day-time and 8 in night-time. In each haul and for each trawl, the total length (rounded down to the lower centimetre) of all haddock individuals was recorded.

### Preliminaries

```
library(selfisher)
library(plyr) #for aggregating data across hauls
library(ggplot2); theme_set(theme_bw())
library(bbmle) #for AICtab
```

```
## Loading required package: stats4
```

```
library(stats4)
library(splines)
```

### Data structure

First, we load the data and check out the variables. Here we can see that all the hauls are contained in one data frame (long format), with each row corresponding to a length class in a given haul. The number of individuals of that length-class caught in each trawl is reported in the columns TEST1 (test trawl) and TEST2 (baseline trawl). The column TIME classifies the haul as day-time (D) or night-time (N).

```
data("comphaddock")
head(comphaddock)
```

```
##   SPECIES HAUL TIME LENGTH TEST1 TEST2
## 1    Had   10    D    5.5     0     0
## 2    Had   10    D    6.5     0     0
## 3    Had   10    D    7.5     0     0
## 4    Had   10    D    8.5     0     0
## 5    Had   10    D    9.5     0     0
## 6    Had   10    D   10.5     0     1
```

To understand if the test trawl caught significantly fewer individuals of a given length-class than the baseline trawl we need to perform a catch comparison analysis (Krag et al., 2015). This analysis estimates the probability of catching an individual of a given length in the test trawl given that it was caught in either trawl.

In addition, the analysis aims at determining if the length-based efficiency of FLEXSELECT presents diel differences, as haddock is known to migrate vertically in the water column during the night.

## Transforming data

Before fitting a model in `selfisher`, the following preparatory steps need to be performed:

- 1) Convert counts (i.e. number of individuals caught per length-class) to totals, proportions and ratios;

```
comphaddock = transform(comphaddock,
  total = TEST1 + TEST2,
  prop = TEST1 / (TEST1+TEST2),
  ratio = TEST1 / TEST2
)
```

This step is required because, unlike with other GLM functions for binomial regression, it is not possible in `selfisher` to specify the binomial variable as a two-column response variable, e.g. `cbind(N_TEST1, N_TEST2)`.

- 2) Remove eventual length classes where no individuals were caught;

```
comphaddock = subset(comphaddock, !is.na(prop))
```

- 3) Scale the length. This step is necessary for numerical stability, as a model often used for catch comparison analyses is the polynomial of order four, which requires to raise the length to the 4th power.

```
comphaddock$s1 = scale(comphaddock$LENGTH)
```

```
head(comphaddock)
```

| ##    | SPECIES | HAUL | TIME | LENGTH | TEST1 | TEST2 | total | prop       | ratio      | s1        |
|-------|---------|------|------|--------|-------|-------|-------|------------|------------|-----------|
| ## 6  | Had     | 10   | D    | 10.5   | 0     | 1     | 1     | 0.00000000 | 0.00000000 | -1.750253 |
| ## 9  | Had     | 10   | D    | 13.5   | 0     | 5     | 5     | 0.00000000 | 0.00000000 | -1.433650 |
| ## 10 | Had     | 10   | D    | 14.5   | 1     | 10    | 11    | 0.09090909 | 0.10000000 | -1.328116 |
| ## 11 | Had     | 10   | D    | 15.5   | 8     | 15    | 23    | 0.34782609 | 0.53333333 | -1.222581 |
| ## 12 | Had     | 10   | D    | 16.5   | 11    | 11    | 22    | 0.50000000 | 1.00000000 | -1.117047 |
| ## 13 | Had     | 10   | D    | 17.5   | 7     | 21    | 28    | 0.25000000 | 0.33333333 | -1.011513 |

## Model fitting

The following is a typical model for catch comparison data with multiple paired hauls, which models the proportion of fish in the test versus the baseline trawl (`prop`) as a function of length (`s1`). This is expressed in the `selfisher` function by a two sided formula with the proportion (`prop`) on the left side and fixed and random effects on the right side. Formulas in the `selfisher` package follow the convention of the `lme4` and `glmmTMB` packages.

Since we are interested in determining if there is a length-dependent difference in the efficiency of the Test gear between day-time and night-time, we include in the model `TIME` as an explanatory variable.

```
m1 = selfisher(prop~(s1+I(s1^2)+I(s1^3)+I(s1^4))*TIME, total = total, comphaddock, haul = HAUL)
```

In this example all individuals were length-measured (i.e. there was no subsampling). In case of a subsampled species, an offset or q-ratio needs to be specified in the model. The `selfisher` function takes the `total` number of fish in the test and baseline using a separate argument, `total`. The argument `haul` needs to be specified in order to perform double-bootstrapping as demonstrated below. Otherwise, it could be omitted from the model specification as it doesn't affect the fit. The `haul` argument tells the software how to group the data for resampling in the bootstrapping procedure.

## Alternative model

An alternative approach would consist in fitting a spline (Miller, 2013), often preferred to polynomial interpolation because it yields similar results while avoiding Runge's phenomenon (i.e. oscillation at the edges

of the length range represented in the data).

```
m2 = selffisher(prop~(bs(s1, df=4))*TIME, total = total, comphaddock, haul=HAUL)
m3 = selffisher(prop~(bs(s1, df=5))*TIME, total = total, comphaddock, haul=HAUL)
```

## Model comparison

We can determine which model fits best using the Akaike's Information Criterion (AIC; Akaike, 1974).

```
AICtab(m1, m2, m3)
```

```
##      dAIC df
## m3  0.0 12
## m1  0.4 10
## m2  6.8 10
```

This tells us that m1 and m3 show equally good fit (0.4 delta AIC units). According to the parsimony rule, we selected m1 that is a simpler model.

## Predictions

To see how the model fits the data, we need to plot observations and predictions together, keeping them separated by TIME.

```
dat_D = comphaddock[ which(comphaddock$TIME=='D'), ]
dat_N = comphaddock[ which(comphaddock$TIME=='N'), ]
newdata1 = data.frame(LENGTH = unique(dat_D$LENGTH), TIME = "D")
newdata2 = data.frame(LENGTH = unique(dat_N$LENGTH), TIME = "N")

newdata = rbind(newdata1, newdata2, deparse.level = 1)

newdata = transform(newdata,
                    s1 = (LENGTH - mean(comphaddock$LENGTH)) / sqrt(var(comphaddock$LENGTH)),
                    total = 1,
                    HAUL = NA
)

newdata$prop = predict(m1, newdata = newdata, type = "response")
```

## Confidence intervals by double-bootstrapping

We then estimate the 95% Efron Confidence intervals (Efron, 1982), by accounting for within- and between-hauls variation (Millar, 1993). The code below resamples hauls, then resamples fish within hauls, fits the model to the resampled data, then makes predictions from the model onto `newdata`. The type of predictions we want in this case are the catch comparison rates, thus we specify `type="response"`. To read about the `predict` function, type `?predict.selffisher` in the R console.

## Windows bootstrapping in parallel

```
library(snow)

ncpus = 4
cl = makeCluster(rep("localhost", ncpus))
clusterExport(cl, "newdata")
bs = bootSel(m1, nsim = 1000, parallel = "snow", cl = cl,
```

```
FUN = function(mod){predict(mod, newdata = newdata, type = "response")}  
stopCluster(c1)
```

## Code for bootstrapping in Mac and Linux

```
bs = bootSel(m1, nsim = 1000, parallel = "multicore", ncpus = 4,  
            FUN = function(mod){predict(mod, newdata = newdata, type = "response")})
```

Then we calculate quantiles across bootstraps for each row of newdata.

```
quants = apply(bs$t, 2, quantile, c(0.025, 0.5, 0.975))  
newdata[,c("lo", "mid", "hi")] = t(quants)
```

## Plotting with CIs

Here, we plot the modelled catch comparison curve with CIs and experimental observations, obtained by aggregating the hauls per TIME.

```
sumdat1 = ddply(dat_D, ~LENGTH+s1, summarize,  
               prop = sum(TEST1)/sum(total),  
               ratio = sum(TEST1)/sum(TEST2),  
               total = sum(total),  
               TIME = "D")  
  
sumdat2 = ddply(dat_N, ~LENGTH+s1, summarize,  
               prop = sum(TEST1)/sum(total),  
               ratio = sum(TEST1)/sum(TEST2),  
               total = sum(total),  
               TIME = "N")  
  
sumdat = rbind(sumdat1, sumdat2)  
  
ggplot(sumdat, aes(LENGTH, prop))+geom_point(aes(size = total, col = TIME), alpha = 0.5)+  
  geom_line(data = newdata, aes(col = TIME))+  
  geom_ribbon(data = newdata, aes(ymin = lo, ymax = hi, fill = TIME), alpha = 0.2)+  
  ylab("Catch comparison rate") + xlab("Length (cm)")
```

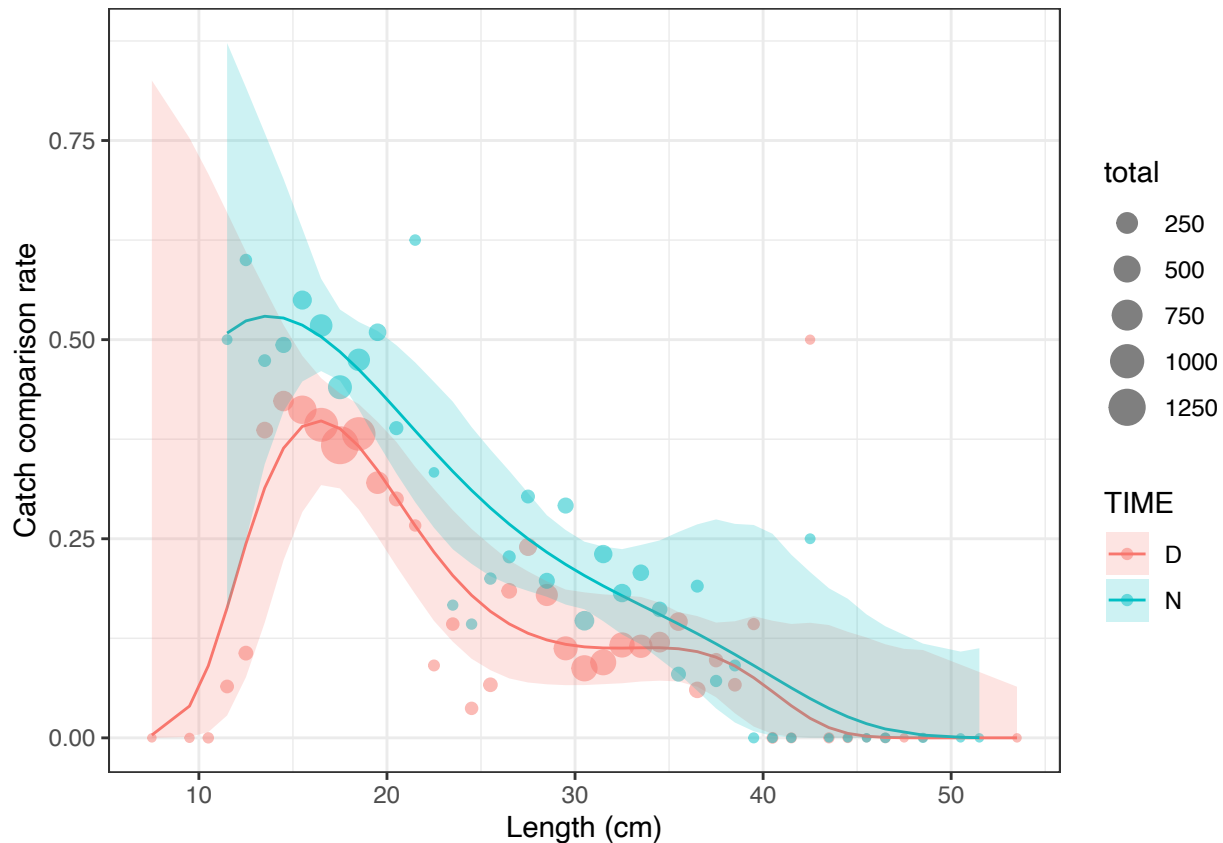

In accordance to Melli et al. (2018) a significant difference in catch comparison rate between day-time and night-time is found for individuals between 16 and 18 cm, as represented by the lack of overlapping between the CIs.

Melli et al. (2018) argued that, being the difference in a length range that is not usually retained when using a commercial codend, and that commercial fishing operations take place in both day- and night-time conditions, it is of greater interest to estimate the effect of FLEXSELECT with respect to the baseline trawl without the factor TIME.

Therefore, we repeat the steps of the process leaving out the factor TIME.

```
m4 = selffisher(prop~sl+I(sl^2)+I(sl^3)+I(sl^4), total = total, comphaddock, haul = HAUL)
m5 = selffisher(prop~bs(sl, df = 4), total = total, comphaddock, haul = HAUL)
```

```
AICtab(m4, m5)
```

```
##      dAIC df
## m4  0.0  5
## m5  5.1  5
```

Again, we select the polynomial of order 4 and use it to predict the catch comparison rates with CIs, which are then plotted against the overall experimental observations.

#### Windows code

```
ncpus = 4
cl = makeCluster(rep("localhost", ncpus))
clusterExport(cl, "newdata")
bs = bootSel(m4, nsim = 1000, parallel = "snow", cl = cl,
```

```
FUN = function(mod){predict(mod, newdata = newdata, type = "response")}  
stopCluster(c1)
```

## Mac and Linux code

```
bs = bootSel(m4, nsim = 1000, parallel = "multicore", ncpus = 4,  
  FUN = function(mod){predict(mod, newdata = newdata, type = "response")})
```

```
quants = apply(bs$t, 2, quantile, c(0.025, 0.5, 0.975))  
newdata[,c("lo", "mid", "hi")] = t(quants)
```

```
sumdat = ddply(comphaddock, ~LENGTH+s1, summarize,  
  prop = sum(TEST1)/sum(total),  
  ratio = sum(TEST1)/sum(TEST2),  
  total = sum(total))
```

```
ggplot(sumdat, aes(LENGTH, prop))+geom_point(aes(size = total), alpha = 0.5)+  
  geom_line(data = newdata)+  
  geom_ribbon(data = newdata, aes(ymin = lo, ymax = hi), alpha = 0.2)+  
  ylab("Catch comparison rate") + xlab("Length (cm)")
```

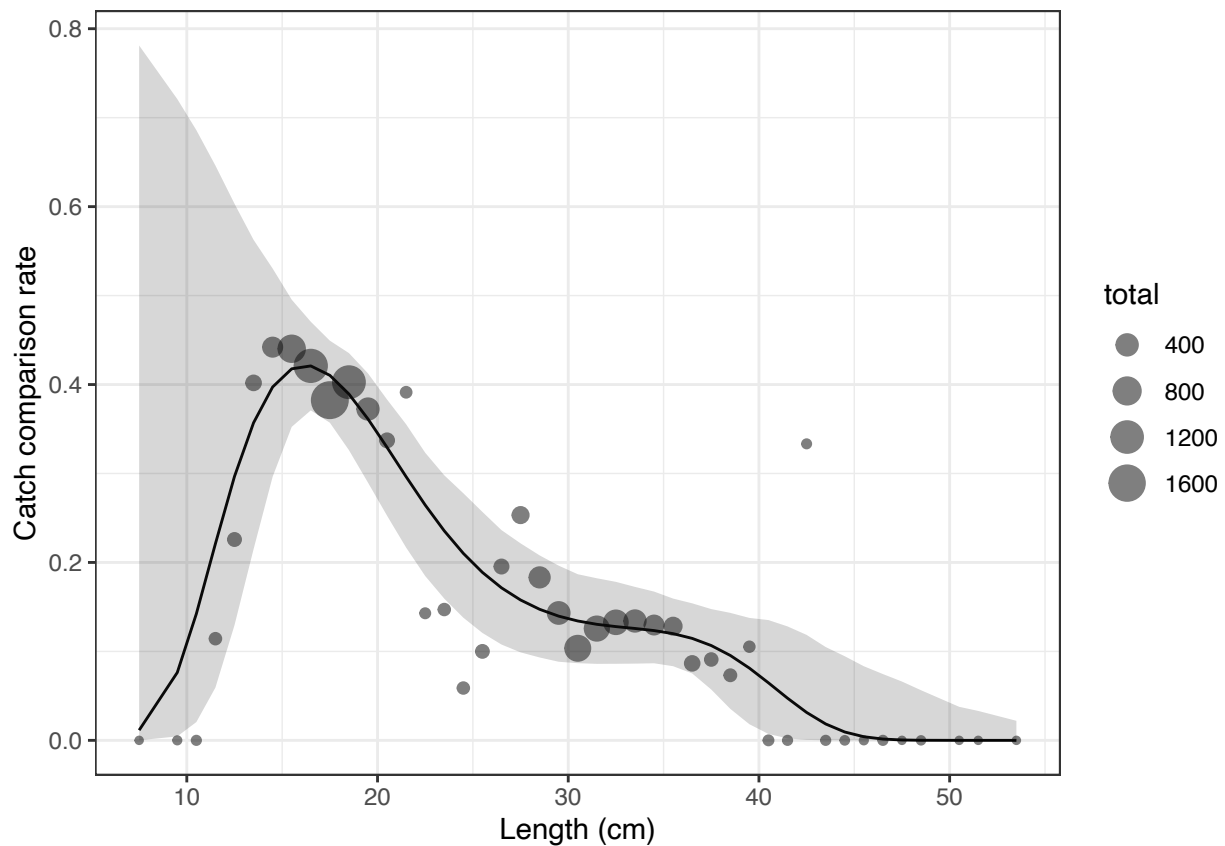

A graphical comparison to the published results in Melli et al. (2018; in red) shows that the estimated catch comparison curves and relative CIs are very similar.

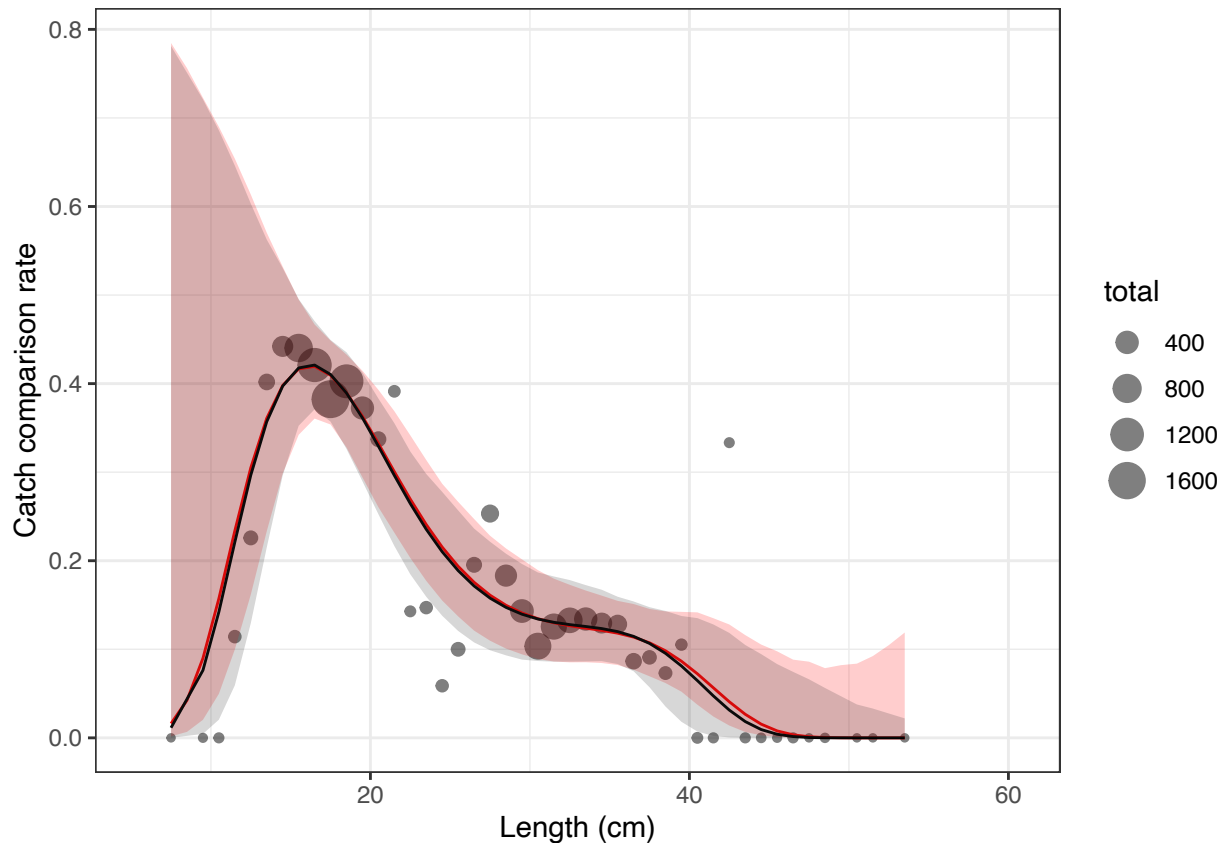

## Catch ratio

To directly quantify the difference in catch between the test and baseline trawls, it is common practice to estimate the catch ratio curve, using the relationship between catch comparison rate (cc) and catch ratio (cr):  $cr = cc / (1 - cc)$

First, we obtain predictions for the catch ratio specifying `type="ratio"` in the `predict` function.

```
newdata$ratio = predict(m4, newdata = newdata, type = "ratio")
```

Second, we apply the relationship between cc and cr to obtain the CIs for the catch ratio curve.

```
bs$cr = bs$t / (1 - bs$t)
```

```
CRquants = apply(bs$cr, 2, quantile, c(0.025, 0.5, 0.975))
```

```
newdata[,c("cr_lo", "cr_mid", "cr_hi")] = t(CRquants)
```

## Catch ratio plot

```
ggplot(sumdat, aes(LENGTH, ratio))+  
  geom_line(data = newdata, aes(y = ratio))+  
  geom_hline(aes(yintercept = 1), size = 0.2, linetype = "dashed")+  
  geom_ribbon(data = newdata, aes(ymin = cr_lo, ymax = cr_hi), alpha = 0.2)+  
  ylab("Catch ratio")+ xlab("Length (cm)") +  
  coord_cartesian(ylim = c(0, 3))
```

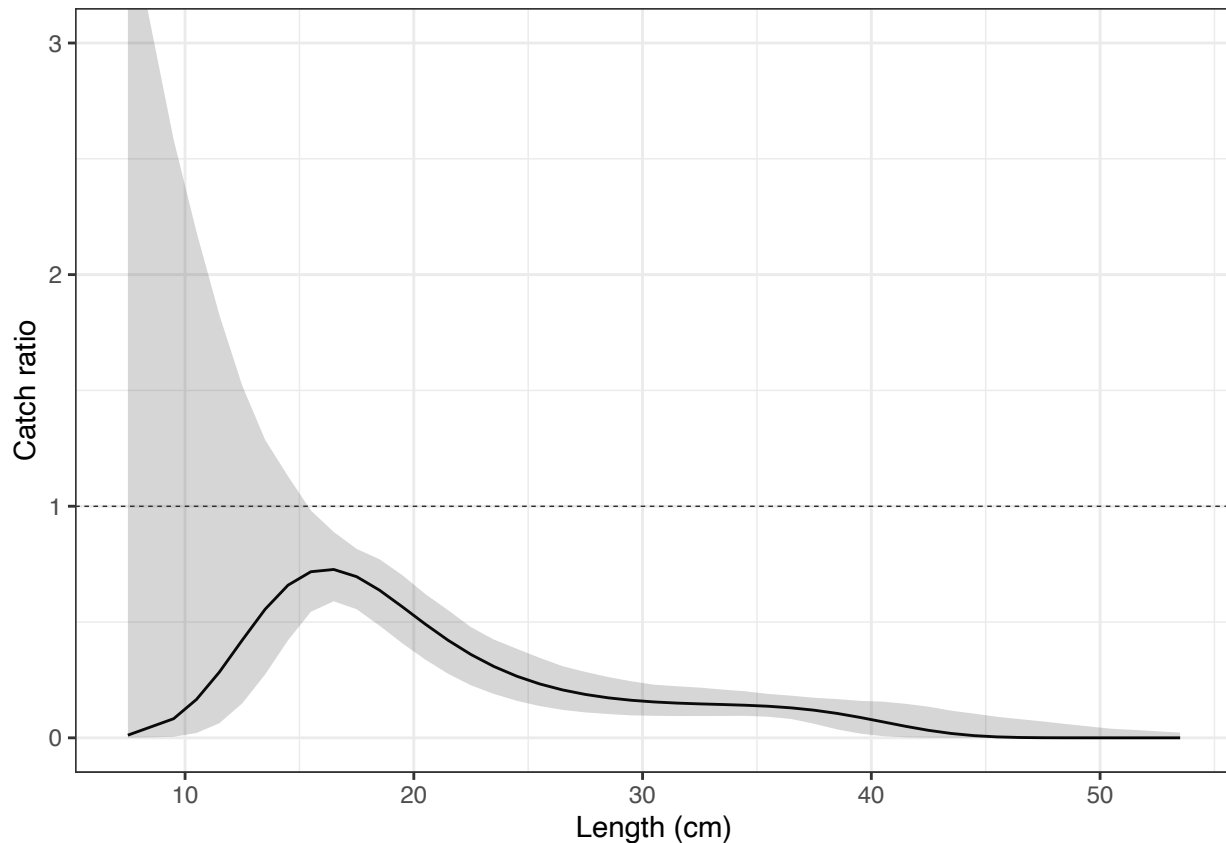

The results show that for individuals above 16 and up to 53 cm, the test gear with FLEXSELECT retained significantly fewer individuals. The effect is length-dependent, with a more pronounced reduction at larger length classes. Considering a minimum conservation reference size of 27cm for haddock in the fishing area (Skagerrak and Kattegat), the reduction of commercial-sized individuals is above 60%.

## References

- Akaike, H. (1974). A new look at the statistical model identification. *IEEE T. Automat. Contr.* 19, 716–722.
- Efron, B. (1982). The jackknife, the bootstrap and other resampling plans. In *Society for industrial and applied mathematics (SIAM) Monograph No. 38*, CBSM-NSF.
- Krag, L.A., Herrmann, B., Karlsen, J.D., and Mieske, B. (2015). Species selectivity in different sized topless trawl designs: Does size matter? *Fish. Res.* 172, 243-249.
- Melli, V., Karlsen, J.D., Feekings, J.P., Herrmann, B., and Krag, L.A. (2018). FLEXSELECT: counter-herding device to reduce bycatch in crustacean trawl fisheries. *Canad. J. Fish. Aquat. Sci.* 75, 850–860.
- Millar, R.B. (1993). Incorporation of between-haul variation using bootstrapping and nonparametric estimation of selection curves. *Fish. Bullet.* 91, 564–572.
- Miller, T. (2013). A comparison of hierarchical models for relative catch efficiency based on paired-gear data for US Northwest Atlantic fish stocks. *Can. J. Fish. Aquat. Sci.* 70(9), 1306–1316.
